1 **Genetic structure of invasive baby's breath (*Gypsophila paniculata*) populations in a**  
2 **freshwater Michigan dune system**  
3

4 Hailee B. Leimbach – Maus<sup>1,2</sup>, Syndell R. Parks<sup>1</sup>, and Charlyn G. Partridge<sup>1</sup>

5

6 <sup>1</sup>Annis Water Resources Institute, Grand Valley State University (AWRI-GVSU), 740 W.

7 Shoreline Dr., Muskegon, MI 49441 USA

8

9 <sup>2</sup>Corresponding author: Hailee B. Leimbach – Maus

10 Annis Water Resources Institute, Grand Valley State University (AWRI-GVSU)

11 740 W. Shoreline Dr., Muskegon, MI 49441 USA

12 Telephone: (440) 488-8042 (no fax)

13 Email addresses: [hailee.leimbachmaus@gmail.com](mailto:hailee.leimbachmaus@gmail.com)

14

15 Running title: Leimbach – Maus et al. – invasive baby's breath population structure

16 Word count: 6715.

17

18

19

20

21

22

23

24

25

26

27

28

29  
30  
31  
32  
33  
34  
35  
36  
37  
38  
39  
40  
41  
42  
43  
44  
45  
46  
47  
48  
49  
50  
51

## ABSTRACT

Coastal sand dunes are dynamic ecosystems with elevated levels of disturbance, and as such they are highly susceptible to plant invasions. One such invasion that is of major concern to the Great Lakes dune systems is that of perennial baby's breath (*Gypsophila paniculata*). The invasion of baby's breath negatively impacts native species such as the federal threatened Pitcher's thistle (*Cirsium pitcheri*) that occupy the open sand habitat of the Michigan dune system. Our research goals were to (1) quantify the genetic diversity of invasive baby's breath populations in the Michigan dune system, and (2) estimate the genetic structure of these invasive populations. We analyzed 12 populations at 14 nuclear and 2 chloroplast microsatellite loci. We found strong genetic structure among populations of baby's breath sampled along Michigan's dunes (global  $F_{ST} = 0.228$ ), and also among two geographic regions that are separated by the Leelanau peninsula. Pairwise comparisons using the nSSR data among all 12 populations yielded significant  $F_{ST}$  values. Results from a Bayesian clustering analysis suggest two main population clusters. Isolation by distance was found over all 12 populations ( $R = 0.755$ ,  $P < 0.001$ ) and when only cluster 2 populations were included ( $R = 0.523$ ,  $P = 0.030$ ); populations within cluster 1 revealed no significant relationship ( $R = 0.205$ ,  $P = 0.494$ ). Private nSSR alleles and cpSSR haplotypes within each cluster suggest the possibility of at least two separate introduction events to Michigan.

**Key words:** Invasive species, genetic diversity, genetic structure, invasion history, microsatellites, *Gypsophila paniculata*.

52

53

## INTRODUCTION

54 Coastal sand dunes are dynamic ecosystems. Both the topography and biological community are

55 shaped by disturbance from fluctuations in water levels, weather patterns, and storm events

56 (Arbogast and Loope 1999, Everard et al. 2010, Blumer et al. 2012). In these primary

57 successional systems, vegetation plays an imperative role in trapping sand and soil, both of

58 which accumulate over time and result in sand stabilization and dune formation (Cowles 1899,

59 Olson 1958, Arbogast 2015). Much of the vegetative community native to coastal dune systems

60 is adapted to the harsh conditions posed by the adjacent coast, and some species require early

61 successional, open habitat to thrive (Albert 2000, Everard et al. 2010). For example, dune species

62 such as Marram grass (*Ammophila brevigulata*), Lake Huron tansy (*Tanacetum huronense*), and

63 Pitcher's thistle (*Cirsium pitcheri*) are adapted to sand burial and will continue to grow above the

64 sand height as it accumulates (Albert 2000). It is the heterogeneous topography and successional

65 processes due to continuous disturbance that makes dune systems so unique (Everard et al.

66 2010).

67 Because coastal dune ecosystems have naturally elevated levels of disturbance, they are

68 highly susceptible to plant invasions (Jorgensen and Kollman 2009, Carranza et al. 2010, Rand et

69 al. 2015). Invasive plant species are known to be adept at colonizing disturbed areas, and in

70 sparsely-vegetated dune systems that are often in early stages of succession, the opportunities for

71 invasive colonizers are great (Cowles 1899, Grime 1979, Baker 1986, Sakai et al. 2001). Coastal

72 dune systems also typically have a gradient of increasing stages of succession (Cusseddu et al.

73 2016) and this heterogeneous structure can further promote various stages of an invasion, such as

74 colonization, dispersal, and range expansion (With 2002, Theoharides and Dukes 2007).

75 Within the MI dunes system, these successional processes have resulted in a patchwork pattern  
76 with alternating areas of open dune habitat, interdunal swales, shrub-scrub, and forested pockets  
77 scattered across the landscape (Cowles 1899, Albert 2000, Blumer et al. 2012). This landscape  
78 structure can play an important role in shaping species migration, invasive spread, and  
79 population demographics (With 2002, Theoharides and Dukes 2007, Jorgensen and Kollman  
80 2009), thus potentially driving patterns of population structure for invasive species. However,  
81 management of dune communities can also have a strong impact on invasive populations, as well  
82 as the native plant community and the landscape they are invading. Invasive beach grasses  
83 *Ammophila breviligulata* and *A. arenaria*, and the management practices used to reduce their  
84 impact, led to changes in the morphology of the coastal dune ecosystem by decreasing the  
85 maximum dune elevation (Zarnetske et al. 2010). Thus, just as a landscape can shape invasive  
86 populations, a plant invasion can also significantly alter the dune landscape (Grime 1979,  
87 Cowles 1899, Sakai et al. 2001, Zarnetske et al. 2010).

88 In addition to the landscape, demographic processes during a species' invasion also shape  
89 the genetic structure observed in contemporary populations. Multiple separate introduction  
90 events can result in contemporary populations that are genetically distinct from one another and  
91 from the native range (Dlugosch and Parker 2008, Crosby et al. 2014, Hagenblad et al. 2015).  
92 Bottleneck events during an introduction can further limit the genetic variation in the invasive  
93 range, though this has not necessarily been found to limit the success of an invader (Dlugosch  
94 and Parker 2008, Xu et al. 2015). Additionally, genetic admixture and inbreeding can shape the  
95 structure of populations, and the effect of these processes can be further influenced by the  
96 landscape structure and habitat heterogeneity (Crosby et al. 2014, Nagy and Korpelainen 2014,  
97 Moran et al. 2017, Bustamante et al. 2018).

98 Perennial baby's breath (*Gypsophila paniculata*) has been identified as a species of  
99 concern due to its impact on the integrity of the Michigan dune system (DNR 2015). A perennial  
100 iteroparous forb native to the Eurasian steppe region (Darwent and Coupland 1966, Darwent  
101 1975), baby's breath has been found to negatively impact the coastal dune community in  
102 Michigan by crowding out sensitive species such as Pitcher's thistle (*Cirsium pitcheri*) through  
103 direct competition for limited resources, forming monotypic stands in the open dune habitat,  
104 preventing the reestablishment of native species, and limiting pollinator visits to native species  
105 (Baskett et al. 2011, Jolls et al. 2015, Emery and Doran 2013). Baby's breath dispersal is thought  
106 to be primarily wind-driven (Darwent and Coupland 1966), which is also the mechanism that  
107 shapes the dunes. Following seed maturity, the stems of baby's breath individuals become dry  
108 and brittle, breaking at the caudex and forming tumbleweed masses that can disperse roughly 10  
109 000 seeds per plant up to 1 km (Darwent and Coupland 1966, Darwent 1975). Due to the  
110 topography and the heterogeneous habitat of the dune systems, the wind patterns of this  
111 landscape have the potential to shape the structure of invasive baby's breath populations. Wind  
112 can drive the direction and distance that baby's breath tumbleweeds disperse, and it is possible  
113 that wind patterns could both promote gene flow or limit it by driving tumbleweeds into  
114 undesirable habitat. Additionally, the steep topography in parts of the dunes could further  
115 prevent tumbleweeds from dispersing significant distances. With these interactive processes in  
116 mind, this study explored the genetic structure of invasive populations of baby's breath within  
117 the Michigan coastal dune system. The goals of this research were to (1) quantify the genetic  
118 diversity of invasive baby's breath populations in the Michigan dune system, and (2) estimate the  
119 genetic structure of these invasive populations. By estimating the genetic diversity and structure

120 of these invasive populations, we can better understand the impact the dune landscape and its  
121 dynamic processes have on this plant invasion.

122

123

## METHODS

### 124 **Study area and sample collection**

125 To determine the population structure of baby's breath on a regional scale in Michigan, we  
126 collected leaf tissue from plants at 12 different sites in the summers of 2016-2017. All sites were  
127 located in areas of known infestation along the dune system of Michigan (Figure 1), and the  
128 majority have a history of treatment primarily by The Nature Conservancy, the Grand Traverse  
129 Regional Land Conservancy, and the National Park Service (TNC 2013). Eleven sites were  
130 located along Lake Michigan in the northwest lower peninsula of Michigan, and one was located  
131 on Lake Superior in the upper peninsula. Seven of these sites are located within Sleeping Bear  
132 Dunes National Lakeshore (hereafter Sleeping Bear Dunes or SBDNL), which contains one of  
133 the largest infestations within the region. We collected leaf tissue samples (5-10 leaves per  
134 individual) from a minimum of 20 individuals per site (maximum of 35), and stored them in  
135 individual coin envelopes in silica gel until DNA extractions took place (total  $n = 313$ ). Site  
136 locations in Michigan (Supplemental A) were separated by a minimum of 10 km and a maximum  
137 of 202 km. We subjectively chose individuals to be sampled by identifying a visibly infested  
138 area, selecting individuals regardless of size, and walking a minimum of ca. 5 meters in any  
139 direction before choosing another plant to minimize the chance of sampling closely related  
140 individuals. We observed that the population distributions at the Petoskey State Park and Grand  
141 Marais sites were smaller and patchier than the others (ca. 60 individuals total), so we conducted  
142 sampling more opportunistically. This opportunistic sampling involved collecting tissue from

143 individuals that were less than 5 m apart, and in some areas sampling from all individuals (ca. 3  
144 – 4 individuals) within a small patch (ca. 5m x 5m).

145

#### 146 **Microsatellite genotyping**

147 We extracted genomic DNA from all samples using DNeasy plant mini kits (QIAGEN, Hilden,  
148 Germany) and followed supplier's instructions with minor modifications, including an extra  
149 wash step with AW2 buffer. We then ran the extracted DNA twice through Zymo OneStep PCR  
150 Inhibitor Removal Columns (Zymo, Irvine, CA) and quantified the concentrations on a  
151 Nanodrop 2000 (Waltham, Massachusetts, USA). We included deionized water controls in each  
152 extraction as a quality control for contamination.

153 We amplified samples at 14 polymorphic nuclear microsatellite loci (hereafter nSSRs)  
154 that were developed specifically for *G. paniculata* using Illumina sequencing technology (Table  
155 1) (Leimbach-Maus et al. 2018). We conducted polymerase chain reactions (PCR) using a  
156 forward primer with a 5'-fluorescent labeled dye (6-FAM, VIC, NED, or PET) (Applied  
157 Biosystems, Foster City, CA) and an unlabeled reverse primer. PCR reactions consisted of 1x  
158 KCl buffer, 2.0-2.5 mM MgCl<sub>2</sub> depending on the locus (Table 1), 300 μM dNTP, 0.08 mg/mL  
159 BSA, 0.4 μM forward primer fluorescently labeled with either FAM, VIC, NED, or PET, 0.4 μM  
160 reverse primer, 0.25 units of Taq polymerase, and a minimum of 50 ng DNA template, all in a  
161 10.0 μL reaction volume. The thermal cycle profile consisted of denaturation at 94°C for 5  
162 minutes followed by 35 cycles of 94°C for 1 minute, annealing at 62°C for 1 min, extension at  
163 72°C for 1 min, and a final elongation step of 72°C for 10 minutes.

164 Each sample was also amplified at 2 universal chloroplast microsatellite loci (hereafter  
165 cpSSRs) previously developed for *Nicotiana tabacum* L. (Chung and Staub 2003) (ccssr4,

166 ccssr9) (Table 1). PCR reactions were conducted using a forward primer with a 5'-fluorescent  
167 labeled dye and an unlabeled reverse primer. PCR reactions for the cpSSRs are the same as  
168 detailed above for the nuclear loci. The thermal cycler profile for cpSSRs is as follows:  
169 denaturation at 94°C for 5 minutes followed by 30 cycles of 94°C for 1 minute, annealing at 52°C  
170 for 1 minute, extension at 72°C for 1 minute, and a final elongation step of 72°C for 8 minutes  
171 (modified from Calistri et al. 2014).

172 We determined successful amplification by visualizing the amplicons on a 2% agarose  
173 gel stained with ethidium bromide. We multiplexed PCR amplicons according to dye color and  
174 allele size range (Table 1), added LIZ Genescan 500 size standard, denatured with Hi-Di  
175 Formamide at 94°C for four minutes, and then performed fragment analysis on an ABI3130xl  
176 Genetic Analyzer (Applied Biosystems) following instrument protocols. We genotyped  
177 individuals using the automatic binning procedure on Genemapper v5 (Applied Biosystems), and  
178 constructed bins following the Genemapper default settings. To account for the risk of  
179 genotyping error when relying on an automated allele-calling procedure, we visually verified that  
180 all individuals at all loci were correctly binned to minimize errors caused by stuttering, low  
181 heterozygote peak height ratios, and split peaks (DeWoody et al. 2006, Guichoux et al. 2011).

182

### 183 **Quality control**

184 Prior to any analysis, we used multiple approaches to check for scoring errors (DeWoody et al.  
185 2006). We checked nSSR genotypes for null alleles and potential scoring errors due to stuttering  
186 and large allele dropout using the software Micro-Checker v2.2.3 (Van Oosterhout et al. 2004,  
187 Van Oosterhout et al. 2006). Prior to marker selection, the loci used in this study were previously  
188 checked for linkage disequilibrium (Leimbach-Maus et al. 2018). We checked for heterozygote



189 deficiencies in the package STRATAG in the R statistical program. We then screened our data  
190 for individuals with more than 20% missing loci and for loci with more than 10% missing  
191 individuals (Gomes et al. 1999, Archer et al. 2016). We found none, so all individuals and loci  
192 remained for further analyses. In addition, we genotyped 95 individuals twice to ensure  
193 consistent allele calls. For the nSSR dataset, we used Genepop 4.2 (Raymond and Rousset 1995,  
194 Rousset 2008) to perform an exact test of Hardy-Weinberg Equilibrium (HWE) with 1,000  
195 batches of 1,000 Markov Chain Monte Carlo iterations (Gomes et al. 1999). We also checked for  
196 loci out of HWE in more than 60% of the populations; however, there were none.

197

#### 198 **nSSR genetic diversity**

199 We calculated the total number of alleles per sampling location, private alleles, observed and  
200 expected heterozygosity in GenAlEx 6.502 (Peakall and Smouse 2006, 2012), and estimated the  
201 inbreeding coefficient ( $F_{IS}$ ) in Genepop 4.2 (Raymond and Rousset 1995, Rousset 2008). We  
202 used the package `diverSity` in the R statistical program to calculate the allelic richness at each  
203 sampling location (Keenan et al. 2013).

204

#### 205 **nSSR genetic structure**

206 To test for genetic differentiation between all pairs of sampling locations, we calculated Weir  
207 and Cockerham's (1984) pairwise  $F_{ST}$  values for 9,999 permutations in GenAlEx 6.502 (Peakall  
208 and Smouse 2006, 2012). In the R statistical program, we corrected the p-values using a false  
209 discovery rate (FDR) correction (Benjamini and Hochberg 1995). To test how much of the  
210 genetic variance can be explained by within and between population variation, we ran an

211 analysis of molecular variance (AMOVA) for 9,999 permutations in GenAlEx 6.502 (Peakall  
212 and Smouse 2006, 2012).

213 To examine the number of genetic clusters among our sampling locations, we used the  
214 Bayesian clustering program STRUCTURE v2.3.2 (Pritchard et al. 2000). Individuals were  
215 clustered assuming the admixture model both with and without a priori sampling locations for a  
216 burn-in length of 100,000 before 1,000,000 repetitions of MCMC for 10 iterations at each value  
217 of  $K$  (1 – 16). The default settings were used for all other parameters. We identified the most  
218 likely value of  $K$  using the  $\ln \Pr(X|K)$  from the STRUCTURE output and the  $\Delta K$  method from  
219 Evanno et al. (2005) in CLUMPAK (Kopelman et al. 2015).

220 To further explore the genetic structure of these populations, we ran a Principal  
221 Coordinates Analysis (PCoA) in GenAlEx 6.50, where the analysis was based on an individual  
222 pairwise genotypic distance matrix (Peakall et al. 1995, Smouse and Peakall 1999). To find and  
223 describe finer genetic structuring of the nSSR dataset, we performed a discriminant analysis of  
224 principal components (DAPC) in the R package *adegenet*, which optimizes among-group  
225 variance and minimizes within-group variance (Jombart 2008, Jombart et al. 2010). To identify  
226 the number of clusters for the analysis, a Bayesian clustering algorithm was run for values of  $K$   
227 clusters (1 – 16). We retained a  $K$ -value of 3 based on the resulting Bayesian Information  
228 Criterion for each  $K$ -value and the results of the previously run PCoA that suggested 3 clusters  
229 may exist within the nSSR data. DAPC can be beneficial, as it can limit the number of principal  
230 components (PCs) used in the analysis. It has been shown that retaining too many PCs can lead  
231 to over-fitting and instability in the membership probabilities returned by the method (Jombart et  
232 al. 2010). Therefore, we performed the cross-validation function to identify the optimal number  
233 of PCs to retain. Out of 69 total PCs, the cross-validation function suggested we retain 60 PCs

234 (Jombart et al. 2010). We ran the DAPC using the recommended 60 PCs, but also checked if the  
235 general patterns remained with fewer PCs used by running the analysis with incrementally less  
236 PCs (45 and 30 PCs). All general patterns of the data in the scatterplots remained consistent  
237 despite the decreased PCs; therefore, we chose to use the scatterplot based on 30 PCs, as the  
238 benefit of the DAPC for our purposes is to show that the main patterns remain, despite  
239 minimization of within population variation (Jombart et al. 2010).

240 To assess the effect of isolation by distance (IBD), we used a paired Mantel test based on  
241 a distance matrix of Slatkin's transformed  $F_{ST}$  ( $D = F_{ST}/(1 - F_{ST})$ ) (Slatkin 1995) and a  
242 geographic distance matrix for 9,999 permutations in GenAlEx 6.502, and the analysis follows  
243 Smouse et al. (1986) and Smouse and Long (1992). The mean geographic center was generated  
244 for each sampling location in ArcGIS software (ESRI<sup>TM</sup> 10.4.1, Redlands, CA), and the latitude  
245 and longitude of these points was then used to construct a matrix of straight line distances in km  
246 between each sampling location. The reported p-values are based on a one-sided alternative  
247 hypothesis ( $H_1: R > 0$ ). A Mantel test was run for all sampling locations together, and a test was  
248 also run separately for populations within each cluster identified in the STRUCTURE analysis.

249

### 250 **cpSSR genetic diversity**

251 For the cpSSR dataset, we used the program HAPLOTYPE ANALYSIS v1.05 (Eliades and  
252 Eliades 2009) to calculate the number of haplotypes, haplotype richness, private haplotypes, and  
253 haploid diversity. To visualize patterns in the cpSSR dataset, we created a minimum spanning  
254 network in the R package poppr (Kamvar et al. 2014). Nei's genetic distance was used as the  
255 basis for the network with a random seed of 9,999.

256

## 257 **nSSR and cpSSR genetic structure**

258 In order to compare the population structure of the nSSR and cpSSR data, we used the  $\Phi_{ST}$   
259 distance matrix for both datasets and ran an AMOVA. The population pairwise  $\Phi_{ST}$  matrix  
260 facilitates comparison of molecular variance between codominant and dominant data by  
261 suppressing within individual variation, thus allowing for the comparison between varying  
262 mutation rates (Weir and Cockerham 1984, Excoffier et al. 1992). To test how much genetic  
263 variation could be explained by within populations, between populations, and between regions  
264 (genetic clusters identified through STRUCTURE analysis) for both datasets, we ran an  
265 AMOVA for 9,999 permutations in GenAlEx 6.502 (Peakall and Smouse 2006, 2012).

266

267

## **RESULTS**

### 268 **Microsatellite genotyping and genetic diversity**

269 We genotyped 313 individuals from 12 locations at 14 nSSR loci (Table 1). No loci showed  
270 evidence for null alleles across all populations, there were no loci with more than 4 populations  
271 significantly out of HWE (less than 30% of populations) (Table 2), and no loci significantly  
272 deviated from linkage equilibrium across all populations. The nSSR loci were moderately  
273 polymorphic, and the number of alleles per locus per population ranged from 1 – 11, with a total  
274 of 85 alleles across 14 loci. Allelic richness ( $A_R$ ) ranged from 2.32 – 4.21 per population with a  
275 mean of 3.53, and GM, PS, and TC populations exhibited lower levels of  $A_R$  than the other  
276 populations. Of the 6 private nSSR alleles identified, 5 were at low frequencies – occurring in  
277 five or fewer individuals, but the private nSSR allele in the GM population occurred in over 60%  
278 of individuals. Overall, the observed heterozygosity ( $H_O$ ) averaged over loci for each population  
279 ranged from 0.25 – 0.56 with a mean of 0.46, and the 3 northernmost populations (GM, PS, TC)

280 had lower diversity in general. Expected heterozygosity ( $H_E$ ) ranged from 0.30 – 0.57 across  
281 populations, with a mean of 0.49. GM and AD populations deviated significantly from HWE ( $P$   
282  $< 0.05$ ). GM had a higher inbreeding coefficient (Table 2), but this could be attributed to our  
283 limited area in which to sample.

284 Both cpSSR loci were polymorphic, with 3 alleles per locus for a total of 6 alleles, and  
285 the number of alleles per population ranged from 2 – 4 with an average of 2.50 (Table 2). All  
286 alleles together resulted in 5 haplotypes. There were between 1 – 3 haplotypes per population for  
287 a haplotype richness ranging from 0.00 – 2.00, with a mean of 0.41 per population. Haplotype  
288 diversity ranged from 0.00 – 0.58 with a mean of 0.10 per population. One allele and haplotype 2  
289 were both unique to the SB and ZP sampling locations, and another allele and haplotype 4 were  
290 both private to five individuals sampled in GM, which occurred in a separate sampling location  
291 from the rest of the individuals in GM (Figure 5).

292

### 293 **Genetic structure**

294 The nSSR data suggested that there is strong genetic structure among the populations and regions  
295 of baby's breath sampled along the dunes of western and northern Michigan (global  $F_{ST} = 0.228$ ).  
296 Pairwise comparisons using the nSSR data among all 12 populations yielded significant  $F_{ST}$   
297 values after a FDR correction (Benjamini and Hochberg 1995) (Table 3). However, all pairwise  
298 comparisons of populations within Sleeping Bear Dunes (GHB, SBP, DC, DP, EB, PB, SB) and  
299 nearby ZP displayed relatively lower pairwise  $F_{ST}$  values (Table 3), suggesting that there is some  
300 gene flow among these populations. The AMOVA based on the nSSR data also found that a  
301 significant amount of the genetic variation could be explained by differences between  
302 populations in the northern region (GM, PS, TC) and populations in the southern region (GHB,

303 SBP, DC, DP, EB, PB, SB, ZP, AD) ( $F_{CT} = 0.144$ ,  $P < 0.0001$ ), as well as among populations  
304 within regions ( $F_{SC} = 0.097$ ,  $P < 0.0001$ ). However, the majority of the genetic variance was  
305 explained by among population differences ( $F_{ST} = 0.228$ ,  $P < 0.0001$ ).

306 The Bayesian clustering analysis from the program STRUCTURE (Pritchard et al. 2000)  
307 partitioned the population into two clusters ( $K = 2$ ) (Figure 2), inferred from both  $\ln \Pr(X|K)$  and  
308 Evanno's  $\Delta K$  (Supplemental B). This analysis was run without inferring any prior information on  
309 sampling location, and then again with sampling information as prior. No differences were  
310 observed between the two results (without priors shown in Figure 2). Cluster 1 is comprised of  
311 the northernmost populations (GM, PS, TC), and cluster 2 includes all other populations.  
312 However, five individuals in the GM population (cluster 1) were assigned to cluster 2  
313 (assignment probability  $> 90\%$ ), and these individuals were located at a separate sampling  
314 location from the rest in GM. In addition, though there is little admixture overall, several  
315 individuals in the GM, TC, EB, and AD populations showed a higher proportion of admixture  
316 among the two clusters.

317 The Principal Coordinates analysis (PCoA) based on an individual pairwise genotypic  
318 distance matrix highlighted population substructuring (Supplemental C). Individuals in the AD  
319 population expanded along both principal coordinates away from individuals assigned to the  
320 original STRUCTURE cluster 2 (Figure 2). In addition, the scatterplot supported the strong  
321 grouping of individuals in GM, PS, and TC together.

322 A Discriminant Analysis of Principal Components (DAPC) scatterplot (Figure 3a)  
323 grouped individuals into three clusters along two axes, supporting the substructuring illustrated  
324 in the PCoA. While the PCoA illustrated global diversity found in the nSSR dataset, the DAPC  
325 optimizes between group variance. Figure 3b shows the overlap between the distributions of

326 individuals in DAPC clusters 2 and 3 along the first discriminant function, suggesting little  
327 distance between them. The membership of individuals of each population to the three illustrated  
328 clusters can be seen in Figure 3c. This visualization of the data further highlights the more subtle  
329 structure of baby's breath populations in the dunes system of Michigan.

330 A Mantel test for isolation by distance (IBD) performed over all populations found a  
331 significant correlation between genetic and geographic distances ( $R = 0.755$ ,  $P < 0.001$ ) (Figure  
332 4a). Upon further exploration of this correlation through separate Mantel tests within each  
333 identified STRUCTURE cluster, we found a significant correlation within cluster 2 (Figure 4c)  
334 ( $R = 0.523$ ,  $P = 0.030$ ), but no significant correlation within cluster 1 (Figure 4b) ( $R = 0.205$ ,  $P =$   
335  $0.494$ ).

336 The AMOVA based on  $\Phi_{ST}$  distance (Supplemental D) facilitated the comparison  
337 between the nSSR and cpSSR data, which resulted in a significant amount of the genetic  
338 variation explained by differences among regions (nSSR  $\Phi_{CT} = 0.226$ , cpSSR  $\Phi_{CT} = 0.263$ ),  
339 among populations within regions (nSSR  $\Phi_{SC} = 0.167$ , cpSSR  $\Phi_{SC} = 0.643$ ), and within  
340 populations (nSSR  $\Phi_{ST} = 0.355$ , cpSSR  $\Phi_{ST} = 0.736$ ) for both data sets ( $P < 0.0001$ ).

341 For the cpSSR markers, the minimum spanning network illustrates the distribution of  
342 haplotypes across the 12 populations (Figure 5). Five haplotypes were found; Haplotype 1 was  
343 the most common, but only occurred in the SBDNL and ZP populations (GHB, SBP, DC, DP,  
344 EB, PB, SB, ZP). Haplotype 2 was private to the SB and ZP populations, but rare, occurring in  
345 one and two individuals, respective to the populations. Haplotype 3 was private to the five GM  
346 individuals located separately from the majority of the other individuals from the GM  
347 population. Haplotype 4 was private to SB, ZP, and AD populations, and occurred in all AD

348 individuals, but was less common in the SB and ZP populations. Haplotype 5 was private to GM,  
349 PS, and TC populations, occurring in all individuals.

350

351

## DISCUSSION

352 The natural disturbance regime of dynamic sand dune systems can result in a pattern of  
353 fragmented habitat and often sparse vegetative cover, making dune ecosystems highly  
354 susceptible to plant invasions (Jorgensen and Kollman 2009, Carranza et al. 2010, Rand et al.  
355 2015). The topography, geographic distribution of preferred habitat, and disturbance regime in  
356 an ecosystem can influence various stages of a species invasion, including where the plant  
357 establishes, its dispersal patterns, and how densely it grows (With 2002, Theoharides and Duker  
358 2007). In addition, the demographic processes of an introduction event can shape contemporary  
359 population dynamics (Dlugosch and Parker 2008, Estoup and Guillemaud 2010). The invasion of  
360 baby's breath in the Michigan dune system is an opportunity to better understand the genetic  
361 structure of invasive species in this system and how the dynamic landscape of these dunes may  
362 be shaping it. Our results indicate variation in genetic diversity among populations, as well as  
363 strong genetic structure that clusters individuals into two distinct groups. These two groups are  
364 separated by a peninsula that could be limiting gene flow between the two groups, causing this  
365 genetic separation.

366 We observed moderate levels of nuclear and chloroplast genetic diversity across  
367 populations of baby's breath throughout the dune system of Michigan (Table 1). However,  
368 genetic diversity in our northern-most populations (Grand Marais, Petoskey State Park, and  
369 Traverse City) was typically lower compared to that found in the populations in Sleeping Bear  
370 Dunes, Zetterberg Preserve, and Arcadia Dunes. Differences in the level of genetic diversity



371 among these regions could be due to differences in population size. Sleeping Bear Dunes is a  
372 largescale infestation and has some of the highest densities of baby's breath found within the  
373 Michigan coastal dunes (TNC 2013), consisting of up to 80% of the vegetation and covering  
374 hundreds of acres in some areas. The Grand Marais, Petoskey State Park, and Traverse City  
375 populations are much smaller than those found in Sleeping Bear Dunes, with continuous  
376 populations often limited to less than 45 acres (TNC 2012 internal report). These smaller  
377 populations could be more affected by the impact of genetic drift and potential inbreeding,  
378 resulting in the observed lower levels of genetic diversity (Ellstrand and Elam 1993, Young et al.  
379 1996, Keller and Waller 2002).

380         The level of isolation between Grand Marais, Petoskey State Park, and Traverse City  
381 could also be contributing to the lower levels of genetic diversity observed in these areas  
382 compared to other populations.  $F_{ST}$  values among these three populations ranged from 0.121 –  
383 0.221, which is much higher than the  $F_{ST}$  range observed between the Sleeping Bear Dunes,  
384 Zetterberg Preserve, and Arcadia Dunes populations (0.041 – 0.137). This suggests that our  
385 northern-most populations may have less gene flow between neighboring populations. This could  
386 be the result of larger geographic distances between these locations. For example, Grand Marais  
387 is located in Michigan's upper peninsula while Petoskey State Park and Traverse City are located  
388 in the lower peninsula. Higher levels of isolation could also be a result of decreased availability  
389 of suitable habitat, which may be more limited between these areas. Sleeping Bear Dunes and  
390 nearby surrounding areas make up a large contiguous amount of land that has been preserved by  
391 the National Parks Service, The Nature Conservancy, and other local land conservancies. Thus,  
392 the dune habitat is often continuous, with limited human development. On the other hand,  
393 Traverse City, Petoskey State Park, and Grand Marais areas have more human development

394 along the lakeshore, which may provide additional barriers to gene flow among these  
395 populations.

396 Management histories could also be contributing to the differences in genetic diversity  
397 seen among these populations of baby's breath. The entire Petoskey State Park population was  
398 treated with herbicide or manual removal from 2007 – 2012 by The Nature Conservancy. At this  
399 time, managers considered the population to be at a desirable management level, and it has been  
400 unmanaged since (TNC 2012 internal report). It is possible that the intensive management  
401 resulted in a population bottleneck, and the population rebound following 2012 came from a  
402 reduced number of individuals leading to the reduced genetic diversity that we observe today.  
403 However, this is probably not the only reason for the lower levels observed. The Arcadia Dunes  
404 and Zetterberg Preserve populations have also been regularly managed since 2004 and 2007,  
405 respectively, so if management is solely driving these patterns we would expect Arcadia Dunes  
406 and Zetterberg Preserve to also have reduced genetic diversity. Although the Arcadia Dunes  
407 population does have the lowest allelic richness and heterozygosity of all the populations in  
408 cluster 2 (Figure 2), both populations have relatively high genetic diversity despite over ten years  
409 of management. It is possible that higher levels of gene flow between these populations and  
410 those in Sleeping Bear Dunes may be helping to maintain genetic diversity.  $F_{ST}$  values between  
411 Zetterberg Preserve and other populations in Sleeping Bear Dunes range from 0.017 – 0.090,  
412 suggesting some gene flow, particularly with the population at the southern boundary (SB) of  
413 Sleeping Bear Dunes. Furthermore, infestations on private properties adjacent to Zetterberg  
414 Preserve have presumably buffered the population sizes. Given Petoskey State Park's geographic  
415 distance from Sleeping Bear Dunes, limited gene flow between them would prevent the  
416 maintenance of high genetic diversity after intense management.

417           The topography and habitat heterogeneity of the dune system likely contributes to the  
418 pattern of population structure of baby's breath throughout the Michigan dunes. Habitat  
419 heterogeneity can drive population structure, with variation in habitat type within the dunes  
420 acting as barriers to dispersal (Henry et al. 2009, Fant et al. 2014). Baby's breath is typically  
421 found in open back dune habitat, but has also been found in the fore dunes close to the lake  
422 beach and on steep dune sides. However, forested areas that are part of the back dunes have been  
423 identified by land managers as barriers between populations, preventing population spread of  
424 baby's breath (personal communication, Shaun Howard and Jon Throop). This can lead to  
425 populations in relatively close proximity to one another showing high levels of genetic  
426 differentiation and is likely a contributor to the significant population structure found among the  
427 populations in Sleeping Bear Dunes. For example, the Empire Bluff population (EB) is located  
428 on the tip of a dune bluff: a small visitor outlook point surrounded by forest, and seems to be  
429 isolated from nearby populations. Despite its geographic proximity to Platte Bay (PB) (8.22 km),  
430 it is more genetically similar to Sleeping Bear Point (SBP), a population 12.73 km away ( $F_{ST} =$   
431  $0.106$  and  $F_{ST} = 0.069$  respectively).

432           A Mantel test for isolation by distance (IBD) revealed a moderate positive relationship  
433 between nSSR genetic distances (based on transformed pairwise  $F_{ST}$  values) and geographic  
434 distances (straight-line distances in km) of all populations (Figure 4a), and was also found for the  
435 analysis of populations in STRUCTURE cluster 2 (Figure 4c). However, when examining the  
436 IBD relationship within cluster 1 from the STRUCTURE analysis, this positive relationship is  
437 not significant (Figure 4b). We attribute the overall significant relationships found (Figure 4a and  
438 4c) to the strong genetic differences between populations in the two main clusters, as well as the  
439 genetic difference of the Arcadia Dunes population when compared to Zetterberg Preserve and

440 Sleeping Bear Dunes populations. Though geographic distance possibly influences the strong  
441 structuring of distant populations, the isolating effect of the topography within the dunes could  
442 have an effect that overrides that of geographic distance, particularly on smaller spatial scales  
443 such as that observed in Sleeping Bear Dunes. These results further support the strong regional  
444 differences between the two clusters identified in the Bayesian analysis (Figure 2).

445         The tumbleweed mechanism of dispersal that baby's breath employs could be an  
446 effective means to disperse seeds, but it is possible that the strong topographical structure, habitat  
447 heterogeneity and variable weather patterns within the dunes impact seed dispersal for gene flow  
448 more than they impact pollination. Baby's breath has been found to attract a diverse array of  
449 pollinator species (Baskett et al. 2011, Emery and Doran 2013), sometimes at the expense of  
450 native plant pollination, while seed dispersal is primarily limited to wind-driven tumbleweeds.  
451 The variation in  $\Phi_{ST}$  values between the two marker types (nSSR  $\Phi_{ST} = 0.355$ , cpSSR  $\Phi_{ST} =$   
452  $0.736$ ) indicates that barriers to seed dispersal may be more limiting for gene flow than  
453 pollination. Darwent (1975) also suggested that though seeds could be dispersed up to 1 km,  
454 many of the seeds were released near the parent plant prior to the stems tumbling. This could  
455 result in strong population structure due to a lower frequency of migrants. Therefore, the  
456 elements of the dune ecosystem could be impacting gene flow through seed dispersal by further  
457 limiting the plant's ability to spread throughout the landscape. However, these comparison of  
458 cpSSR results to nSSR should be taken with some caution, as we had a limited number of  
459 polymorphic cpSSR markers. Though we chose to use microsatellites within the chloroplast  
460 genome to increase the likelihood of polymorphism, we still found these regions to be well-  
461 conserved and with limited variation in our dataset. Therefore, we cannot rule out the

462 possibility of fragment size homoplasy confounding results of low genetic diversity in some  
463 populations (Bang and Chung 2015).

464

#### 465 **Structure analysis**

466 Our results from the Bayesian clustering analysis in STRUCTURE (Pritchard et al. 2000,  
467 Evanno et al. 2005) separate the populations of baby's breath along the Michigan coastal dunes  
468 into two genetic clusters ( $K = 2$ ) (Figure 2). A similar pattern was found when the nSSR dataset  
469 was analyzed using a PCoA (Supplemental C) and a DAPC (Figure 3), with the exception that  
470 the individuals of the Arcadia Dunes population further separated from the Sleeping Bear Dunes  
471 and Zetterberg Preserve individuals in the latter analyses. The clusters are mainly divided into  
472 the Traverse City, Petoskey State Park, and Grand Marais cluster (cluster 1) and the Sleeping  
473 Bear Dunes populations, Zetterberg Preserve, and Arcadia Dunes cluster (cluster 2). The  
474 distribution of cpSSR haplotypes (Figure 5) across populations further illustrates the strong  
475 genetic clusters present in this dataset. Specifically, some haplotypes are only found in certain  
476 populations and within each main population cluster. Haplotypes 1, 2, and 4 only occur in  
477 populations in cluster 2. Haplotypes 3 and 5 only occur in cluster 1, with haplotype 3 being  
478 private to the five individuals in Grand Marais that were located separately from the rest of those  
479 sampled at this location (Figure 5). The two distinct population clusters are separated by the  
480 Leelanau peninsula, which may be helping to limit gene flow among these clusters. This  
481 partitioning of cpSSR haplotypes could be due to seed dispersal limitations from habitat  
482 fragmentation, unsuitable habitat, and land use, as the peninsula is comprised mainly of private  
483 residential properties along the narrow shoreline.

484           Understanding the invasion history of a species can help shed light on the factors and  
485 processes that contributed to the success of the species establishment. For baby's breath, it has  
486 been assumed that invasive populations were the result of ornamental plants escaping from  
487 gardens or being purposely planted for horticultural means (personal communication with TNC  
488 managers). Whether the clusters we observed for our dataset are the result of multiple  
489 independent introductions or the result of one introduction followed by serial invasions is not  
490 known. Given that populations along coastal Michigan cluster into two distinct groups, either  
491 scenario is possible (Lombaert et al. 2018). In the serial invasion scenario, a founder population  
492 would have colonized one site in the Michigan coastal dunes, and then migrants from that  
493 population would have invaded subsequent areas (Lombaert et al. 2018). Over time, with limited  
494 gene flow, these populations could have become distinct and structured. However, we think this  
495 scenario may not be the best explanation for this invasion. Based upon herbarium records, the  
496 first occurrence of baby's breath in northwest Michigan was recorded in 1913 in Emmet County  
497 where Petoskey State Park is located (Emmet Co., 1913, catalog: 355638, *Gleason s.n.*, MICH).  
498 Records from Leelanau and Benzie counties, where Sleeping Bear Dunes, Zetterberg Preserve  
499 and Arcadia Dunes are located, were not collected until the late 1940's (Leelanau Co., 1947,  
500 catalog: 355348, *P.W. Thompson L-302*, MICH). If Petoskey State Park was the founding  
501 population for this invasion, we would expect higher genetic diversity in this population relative  
502 to those in Sleeping Bear Dunes, Zetterberg Preserve, and Arcadia Dunes, since a serial  
503 introduction would result in additional bottlenecks from the founding population. However, we  
504 observed the opposite pattern of genetic diversity. Additionally, there are private cpSSR  
505 haplotypes to each of these two clusters (Figure 5), a pattern we would not expect to see if all the  
506 populations came from one introduction event.

507           The other invasion scenario describes at least two independent introductions to the  
508 Michigan coastal dunes (Lombaert et al. 2018). In this scenario, we would expect strong genetic  
509 differentiation between the two or more founding populations. Our data supports this, as we  
510 observed both nSSR and cpSSR alleles privately shared only between populations within the  
511 same cluster. In addition, for the cpSSR markers, distinct haplotypes were found between the  
512 two regions, with haplotype 5 only observed in the Grand Marais, Petoskey State Park, and  
513 Traverse City cluster while haplotypes 1, 2, and 4 were only found in the Sleeping Bear Dunes,  
514 Zetterberg Preserve, and Arcadia Dunes cluster. There was also a high proportion of nSSR  
515 alleles common to both clusters, but this could be the result of limited genetic diversity in the  
516 initial source populations (Allendorf and Lundquist 2003). This scenario is particularly plausible,  
517 as the source populations would likely be a type of horticultural strain, given the popularity of  
518 perennial baby's breath in the floral industry (Vettori et al. 2013, Calistri et al. 2014). This  
519 hypothesis of at least two independent introductions also agrees with the herbarium record: a  
520 potential introduction event could have occurred in the early 1910's, leading to cluster 1 (GM,  
521 PS, TC), and a separate introduction event could have occurred in the late 1940's, leading to the  
522 establishment of the populations in Zetterberg Preserve and Sleeping Bear Dunes (cluster 2).

523           In addition to supporting the identified patterns in the nSSR dataset produced from the  
524 STRUCTURE analysis, the PCoA and DAPC (Supplemental C and Figure 3) allowed us to  
525 identify more subtle population structuring. Specifically, the PCoA (Supplemental C) illustrates  
526 the Arcadia Dunes population separating from the other populations along principal coordinate 2.  
527 The DAPC (Figure 3) also shows the subtler variation among populations within the Sleeping  
528 Bear Dunes populations (specifically Figure 3c), and continues to support the segregation of the  
529 Grand Marais, Petoskey State Park, and Traverse City populations from the rest that we see in

530 the STRUCTURE analysis (Figure 2). Variation in allele frequencies and decreased allelic  
531 richness are two factors that could explain the divergence of the Arcadia Dunes population in the  
532 PCoA (Supplemental C); there are no private alleles or other obvious patterns causing this  
533 population to cluster separately from nearby populations (Zetterberg Preserve and South  
534 Boundary in Sleeping Bear Dunes). The higher rates of admixture between the two main clusters  
535 in Arcadia Dunes individuals (Figure 2) could also be a reason for its slight divergence from  
536 cluster 2. However, what is driving this potential higher level of admixture in the Arcadia Dunes  
537 population compared to others is currently unknown. Arcadia Dunes is a popular recreation area  
538 among locals and tourists (personal communication Jon Throop, Grand Traverse Regional Land  
539 Conservancy). Additionally, the autumn season brings about a high volume of foot traffic  
540 through all the dune areas of Michigan. It is possible that people may be accidentally  
541 transporting baby's breath seeds between these otherwise isolated populations, as the seed  
542 phenology coincides with the autumn senescence. While human transport of seeds may be  
543 occurring at other locations as well, Arcadia Dunes is a small enough population that newly  
544 introduced genotypes could have a higher likelihood of being detected from sampling relative to  
545 other larger populations, such as one in Sleeping Bear Dunes.

546 The invasion of baby's breath to the Great Lakes has the potential to disrupt the  
547 dynamism of the dune landscape and biological community in northwest Michigan, and this  
548 threat has led to increased concern over its pervasiveness regionally and nationally. Estimating  
549 the genetic structure of invasive populations can lead to a better understanding of the invasion  
550 history and the factors influencing the success of an invasion (Crosby et al. 2014, Piya et al.  
551 2014, Sakata et al. 2015). Through population level analysis, we found strong genetic structure  
552 present that separates the invasion in the Michigan dunes into two main regions. Based on these



553 results, we suggest that the contemporary baby's breath population within the Michigan coastal  
554 dune system is the result of at least two separate introduction events. The genetic structure  
555 identified for these baby's breath populations probably results from a combination of  
556 demographic processes –multiple introductions, bottleneck events, isolation, and admixture,  
557 along with landscape level processes. The topography of the dunes is heterogeneous but also  
558 constantly shifting, and the baby's breath invasion is one example of how this dynamic system  
559 can shape the establishment, gene flow, and spread of invasive plant populations.

560

561

562

563

564

565

566

567

568

569

570

571

572

573

574

575

576  
577  
578  
579  
580  
581  
582  
583  
584  
585  
586  
587  
588  
589  
590  
591  
592  
593  
594  
595  
596  
597  
598

## ACKNOWLEDGEMENTS

The authors thank the Environmental Protection Agency – Great Lakes Restoration Initiative Grant (C.G.P., Grant #00E01934) for financial support. We thank Dr. James McNair for assistance with statistical analyses, Dr. Timothy Evans for assistance with herbarium data expertise and submission, and Kurt Thompson for assistance with geographic data collection and visualization. Finally, we thank Emma Rice for all her assistance in field data collection and Matthew Kienitz for his assistance in field and laboratory data collection.

## CONFLICT OF INTEREST

The authors declare there is no conflicts of interest associated with this study.

## DATA ARCHIVING

All genotype data will be submitted to the Dryad Digital Repository upon acceptance. Nuclear microsatellite sequences have been deposited to GenBank (Table 1).

599

## REFERENCES

- 600 Albert DA (2000). *Borne of the Wind, Michigan Sand Dunes*. University of Michigan Press:  
601 Michigan.
- 602
- 603 Allendorf FW, Lundquist LL (2003). Introduction: population biology, evolution, and control of  
604 invasive species. *Conserv Biol* **17**: 24 – 30.
- 605
- 606 Arbogast AF (Department of Geography, Michigan State University, Lansing, MI). The  
607 Emerging Science of Coastal Sand Dune Age and Dynamics: Implications for Regulation and  
608 Risk Management in Michigan. Lansing, MI: *Michigan Environmental Council*: May 2015. 45 p.  
609 Website  
610 [https://d3n8a8pro7vhmx.cloudfront.net/environmentalcouncil/pages/467/attachments/original/15](https://d3n8a8pro7vhmx.cloudfront.net/environmentalcouncil/pages/467/attachments/original/1518314397/Latest_Science-Michigan_Coastal_Dunes.pdf?1518314397%22)  
611 [18314397/Latest\\_Science-Michigan\\_Coastal\\_Dunes.pdf?1518314397%22](https://d3n8a8pro7vhmx.cloudfront.net/environmentalcouncil/pages/467/attachments/original/1518314397/Latest_Science-Michigan_Coastal_Dunes.pdf?1518314397%22) [accessed 06 October  
612 2017].
- 613
- 614 Arbogast AF, Loope WL (1999). Maximum-limiting ages of Lake Michigan coastal dunes: Their  
615 correlation with Holocene lake level history. *J Great Lakes Res* **25**: 372-382.
- 616
- 617 Archer FI, Adams PE, Schneiders BB (2016). STRATAG: An R package for manipulating,  
618 summarizing and analysing population genetic data. *Mol Ecol Resour* **17**: 5–11.
- 619
- 620 Baker HG (1986). Patterns of plant invasion in North America. In: Mooney HA, Drake JA (eds)  
621 *Ecology of Biological Invasions of North America and Hawaii*. Springer, New York, pp 44–57.
- 622
- 623 Bang SW, Chung S-M (2015). One size does not fit all: the risk of using amplicon size of  
624 chloroplast SSR marker for genetic relationship studies. *Plant Cell Rep* **34**: 1681 – 1683.
- 625
- 626 Baskett CA, Emery SM, Rudgers JA (2011). Pollinator Visits to Threatened Species Are  
627 Restored Following Invasive Plant Removal. *Int J Plant Sci* **172**: 411–422.
- 628
- 629 Benjamini Y, Hochberg Y (1995). Controlling The False Discovery Rate - A Practical And  
630 Powerful Approach To Multiple Testing. *J R Stat Soc Series B Stat Methodol* **57**: 289 - 300.
- 631
- 632 Blumer BE, Arbogast AF, Forman SL (2012). The OSL chronology of eolian sand deposition in  
633 a perched dune field along the northwestern shore of Lower Michigan. *Quat Int* **77**: 445 – 455.
- 634
- 635 Bustamante RO, Durán AP, Peña-Gómez FT, Véliz D (2018). Genetic and phenotypic variation,  
636 dispersal limitation and reproductive success in the invasive herb *Eschscholzia californica* along  
637 an elevation gradient in central Chile. *Plant Ecol Divers* **10**: 419 – 429.
- 638

- 639 Calistri E, Buiatti M, Bogani P (2014). Characterization of *Gypsophila* species and commercial  
640 hybrids with nuclear whole-genome and cytoplasmic molecular markers. *Plant Biosyst* **150**: 11 –  
641 21.
- 642
- 643 Carranza ML, Carboni M, Feola S, Acosta ATR (2010). Landscape-scale patterns of alien  
644 species on coastal dunes: the case of iceplant in central Italy. *Appl Veg Sci* **13**: 135-145.
- 645
- 646 Chung S-M, and Staub JE (2003). The development and evaluation of consensus chloroplast  
647 primer pairs that possess highly variable sequence regions in a diverse array of plant taxa. *Theor*  
648 *Appl Genet* **107**: 757–767.
- 649
- 650 Cowles HC (1899). The Ecological Relations of the Vegetation on the Sand Dunes of Lake  
651 Michigan. Part I.-Geographical Relations of the Dune Floras. *Bot Gaz* **27**: 95 – 117.
- 652
- 653 Crosby K, Stokes TO, Latta RG (2014). Evolving California genotypes of *Avena barbata* are  
654 derived from multiple introductions but still maintain substantial population structure. *PeerJ* **2**:  
655 e633.
- 656
- 657 Cusseddu V, Ceccherelli G, Bertness M (2016). Hierarchical organization of a Sardinian sand  
658 dune plant community. *PeerJ* **4**: e2199.
- 659
- 660 Darwent AL (1975). The Biology of Canadian Weeds. 14. *Gypsophila paniculata* L. *Canadian*  
661 *Journal of Plant Science* **55**: 1049–1058.
- 662
- 663 Darwent AL, Coupland RT (1966). Life history of *Gypsophila paniculata*. *Weeds* **14**: 313–318.
- 664
- 665 Dewoody J, Nason JD, Hipkins VD (2006). Mitigating scoring errors in microsatellite data from  
666 wild populations. *Mol Ecol Notes* **6**: 951–957.
- 667
- 668 Dlugosch KM, Parker IM (2008). Founding events in species invasions: Genetic variation,  
669 adaptive evolution, and the role of multiple introductions. *Mol Ecol* **17**: 431 – 449.
- 670
- 671 Department of Natural Resources (DNR) (2015). Michigan Invasive Species Grant Program  
672 Handbook. Website [http://www.michigan.gov/documents/dnr/2015-MISGP-](http://www.michigan.gov/documents/dnr/2015-MISGP-hndbk_491809_7.pdf?source=govdelivery)  
673 [hndbk\\_491809\\_7.pdf?source=govdelivery](http://www.michigan.gov/documents/dnr/2015-MISGP-hndbk_491809_7.pdf?source=govdelivery) [accessed 05 March 2018].
- 674
- 675 Eliades N-G, Eliades DG (2009). HAPLOTYPE ANALYSIS: Software for analysis of haplotype  
676 data. (available from <http://www.uni-goettingen.de/en/134935.html>)
- 677

- 678 Ellstrand NC, Elam DR (1993). Population Genetic Consequences of Small Population Size:  
679 Implications for Plant Conservation. *Annu Rev Ecol Syst* **24**: 217-242.  
680
- 681 Emery SM, Doran PJ (2013). Presence and management of the invasive plant *Gypsophila*  
682 *paniculata* (baby's breath) on sand dunes alters arthropod abundance and community structure.  
683 *Biol Cons* **161**: 174–181.  
684
- 685 Estoup A, Guillemaud T (2010). Reconstructing routes of invasion using genetic data: why, how  
686 and so what. *Mol Ecol* **19**: 4113 – 4130.  
687
- 688 Evanno G, Regnaut S, Goudet J (2005). Detecting the number of clusters of individuals using the  
689 software STRUCTURE: A simulation study. *Mol Ecol* **14**: 2611–2620.  
690
- 691 Everard M, Jones L, Watts B (2010). Have we neglected the societal importance of sand dunes?  
692 An ecosystem services perspective. *Aquat Conserv* **20**: 476–487.  
693
- 694 Excoffier L, Smouse PE, Quattro JM (1992). Analysis of molecular variance inferred from  
695 metric distances among DNA haplotypes: application to human mitochondrial DNA restriction  
696 sites. *Genetics* **131**: 479 – 491.  
697
- 698 Fant JB, Havens K, Keller JM, Radosavljevic A, Yates ED (2014). The influence of  
699 contemporary and historic landscape features on the genetic structure of the sand dune endemic,  
700 *Cirsium pitcheri* (Asteraceae). *Heredity* **112**: 519 – 530.  
701
- 702 Gomes I, Collins A, Lonjou C, Thomas NS, Wilkinson J, Watson M *et al.* (1999). Hardy–  
703 Weinberg quality control. *Ann Hum Genet* **63**: 535–538.  
704
- 705 Grime, J. P. 1979. *Plant Strategies and Vegetation Processes*. John Wiley and Sons: Chichester,  
706 UK.  
707
- 708 Guichoux E, Lagache L, Wagner S, Chaumeil P, Léger P, Lepais O *et al.* (2011). Current trends  
709 in microsatellite genotyping. *Mol Ecol Resour* **11**: 591–611.  
710
- 711 Hagenblad J, Hülskötter J, Acharya KP, Brunet J, Chabrierie O, Cousins SA *et al* (2015). Low  
712 genetic diversity despite multiple introductions of the invasive plant species *Impatiens*  
713 *glandulifera* in Europe. *BMC Genet* **16**:103.  
714
- 715 Henry P, Le Lay G, Goudet J, Guisan A, Jahodová S, Besnard G (2009). Reduced genetic  
716 diversity, increased isolation and multiple introductions of invasive giant hogweed in the western  
717 Swiss Alps. *Mol Ecol* **18**: 2819–2831.

718  
719 Jolls CL, Marik JE, Hamzé SI, Havens K (2015). Population viability analysis and the effects of  
720 light availability and litter on populations of *Cirsium pitcheri*, a rare, monocarpic perennial of  
721 Great Lakes shorelines. *Biol Cons* **187**: 82–90.  
722  
723 Jombart T (2008). adegenet: a R package for the multivariate analysis of genetic  
724 markers. *Bioinformatics* **24**: 1403 – 1405.  
725  
726 Jombart T, Devillard S, Balloux F (2010). Discriminant analysis of principal components: A new  
727 method for the analysis of genetically structured populations. *BMC Genet* **11**: 94.  
728  
729 Jorgensen RH, Kollman J (2009). Invasion of coastal dunes by the alien shrub *Rosa rugosa* is  
730 associated with roads, tracks and houses. *Flora – Morphology, Distribution, Functional Ecology*  
731 *of Plants* **204**: 289-297.  
732  
733 Kamvar ZN, Tabima JF, Grünwald NJ (2014). Poppr: An R Package For Genetic Analysis Of  
734 Populations With Clonal, Partially Clonal, And/or Sexual Reproduction. *PeerJ* **2**: e281.  
735  
736 Keenan K, McGinnity P, Cross TF, Crozier WW, Prodöhl PA, O’Hara RB (2013). diveRsity: An  
737 R package for the estimation and exploration of population genetics parameters and their  
738 associated errors. *Methods Ecol Evol* **4**: 782 – 788.  
739  
740 Keller LF, Waller DM (2002). Inbreeding effects in wild populations. *Trends Ecol Evol* **17**: 230  
741 – 241.  
742  
743 Kopelman NM, Mayzel J, Jakobsson M, Rosenberg NA, Mayrose I (2015). CLUMPAK: a  
744 program for identifying clustering modes and packaging population structure inferences across  
745 K. *Mol Ecol Resour* **15**: 1179 – 1191.  
746  
747 Leimbach-Maus H, Parks S, Partridge C (2018). Microsatellite primer development for invasive  
748 perennial herb, *Gypsophila paniculata* (Caryophyllaceae). *bioRxiv*  
749 <https://doi.org/10.1101/401398>.  
750  
751 Lombaert E, Guillemaud T, Deleury E (2018). Biases of STRUCTURE software when exploring  
752 introduction routes of invasive species. *Heredity* **120**: 485 – 499.  
753  
754 Michigan, Emmet Co.: Pellston, 16 July 1913, *H.A. Gleason s.n.* (MICH).  
755  
756 Michigan, Leelanau Co.: Leland Twp, 05 August 1947, *P.W. Thompson L-302* (MICH).  
757

- 758 Moran EV, Reid A, Levine JM (2017). Population genetics and adaptation to climate along  
759 elevation gradients in invasive *Solidago canadensis*. *PLoS ONE* **12**: e0185539.  
760
- 761 Nagy AM, Korpelainen H (2014). Population genetics of Himalayan balsam (*Impatiens*  
762 *glandulifera*): comparison of native and introduced populations. *Plant Ecol Divers* **8**: 317 – 321.  
763
- 764 Olson JS (1958). Rates of Succession and Soil Changes on Southern Lake Michigan Sand Dunes.  
765 *Bot Gaz* **119**: 125 – 170.  
766
- 767 Peakall R, Smouse PE (2006). GENALEX 6: genetic analysis in Excel. Population genetic  
768 software for teaching and research. *Mol Ecol Notes* **6**: 288 – 295.  
769
- 770 Peakall R, Smouse PE (2012). GenALEX 6.5: genetic analysis in Excel. Population genetic  
771 software for teaching and research-an update. *Bioinformatics* **28**: 2537 – 2539.  
772
- 773 Peakall R, Smouse PE, Huff DR (1995). Evolutionary implications of allozyme and RAPD  
774 variation in diploid populations of dioecious buffalograss *Buchloe dactyloides*. *Mol Ecol* **4**: 135-  
775 147.  
776
- 777 Piya S, Nepal MP, Butler JL, Larson GE, Neupane A (2014). Genetic diversity and population  
778 structure of sickleweed (*Falcaria vulgaris*; Apiaceae) in the upper Midwest USA. *Biol Invasions*  
779 **16**: 2115–2125.  
780
- 781 Pritchard JK, Stephens M, Donnelly P (2000). Inference of population structure using multilocus  
782 genotype data. *Genetics* **155**: 945–959.  
783
- 784 Raymond M, Rousset F (1995). GENEPOP (version 4.2): Population genetics software for exact  
785 tests and ecumenicism. *J Hered* **86**: 248–249.  
786
- 787 Rand TA, Louda SM, Bradley KM, Crider KK (2015). Effects of invasive knapweed (*Centaurea*  
788 *stoebe* subsp. *micranthos*) on a threatened native thistle (*Cirsium pitcheri*) vary with environment  
789 and life stage. *Botany* **93**: 543–558.  
790
- 791 Rousset F (2008). Genepop'007: a complete reimplement of the Genepop software for  
792 Windows and Linux. *Mol Ecol Resour* **8**: 103 – 106.  
793
- 794 Sakai AK, Allendorf FW, Holt JS, Lodge DM, Molofsky J, With KA et al (2001). The  
795 population biology of invasive species. *Annu Rev Ecol Syst* **32**: 305–332.  
796

- 797 Sakata Y, Itami J, Isagi Y, Ohgushi T (2015). Multiple and mass introductions from limited  
798 origins: genetic diversity and structure of *Solidago altissima* in the native and invaded range. *J*  
799 *Plant Res* **128**: 909–921.  
800
- 801 Slatkin M (1995). A measure of population subdivision based on microsatellite allele  
802 frequencies. *Genetics* **139**: 457 – 462.  
803
- 804 Smouse PE, Long JC, Sokal RR (1986). Multiple regression and correlation extensions of the  
805 mantel test of matrix correspondence. *Syst Biol* **35**: 627 – 632.  
806
- 807 Smouse PE, Long JC (1992). Matrix correlation analysis in anthropology and genetics. *Am J*  
808 *Phys Anthropol* **35**: 187 – 213.  
809
- 810 Smouse PE, Peakall R (1999). Spatial autocorrelation analysis of individual multiallele and  
811 multilocus genetic structure. *Heredity* **82**: 561 – 573.  
812
- 813 The Nature Conservancy and partners. (2013). Lake Michigan Coastal Dunes Restoration  
814 Report. The Nature Conservancy. Website  
815 [https://www.nature.org/ourinitiatives/regions/northamerica/unitedstates/michigan/lake-michigan-](https://www.nature.org/ourinitiatives/regions/northamerica/unitedstates/michigan/lake-michigan-dune-report-2013.pdf)  
816 [dune-report-2013.pdf](https://www.nature.org/ourinitiatives/regions/northamerica/unitedstates/michigan/lake-michigan-dune-report-2013.pdf) [accessed 01 November 2017].  
817
- 818 Theoharides KA, Dukes JS (2007). Plant invasion across space and time: factors affecting  
819 nonindigenous species success during four stages of invasion. *New Phytol* **176**: 256 – 273.  
820
- 821 Van Oosterhout C, Hutchinson WF, Wills DPM, Shipley P (2004). MICRO-CHECKER:  
822 software for identifying and correcting genotyping errors in microsatellite data. *Mol Ecol Resour*  
823 **4**: 535–538.  
824
- 825 Van Oosterhout C, Weetman D, Hutchinson WF (2006). Estimation and adjustment of  
826 microsatellite null alleles in nonequilibrium populations. *Mol Ecol Resour* **6**: 255–256.  
827
- 828 Vettori L, Schiff S, Tani C, Pasqualetto P, Bennici A (2013). Morphological and cytological  
829 observations of wild species and hybrids of *Gypsophila*. *Plant Biosyst* **150**: 1 – 11.  
830
- 831 Weir B, Cockerham C (1984). Estimating F-Statistics for the Analysis of Population  
832 Structure. *Evolution* **38**: 1358 – 1370.  
833
- 834 With KA (2002). The landscape ecology of invasive spread. *Conserv Biol* **16**: 1192 – 1203.  
835



836 Xu C-Y, Tang S, Fatemi M, Gross CL, Julien MH, Curtis C *et al.* (2015). Population structure  
837 and genetic diversity of invasive *Phyla canescens*: implications for the evolutionary potential.  
838 *Ecosphere* **6**: 162.

839

840 Young A, Boyle T, Brown T (1996). The population genetic consequences of habitat  
841 fragmentation for plants. *Trends Ecol Evol* **11**: 413 – 418.

842

843 Zarnetske PL, Seabloom EW, Hacker SD (2010). Non-target effects of invasive species  
844 management: beachgrass, birds, and bulldozers in coastal dunes. *Ecosphere* **1**: art13.

845

846

847

848

849

850

851

852

853

854

855

856

857

858

859

860

861

862

863

864

865

866

867

868

869

870

871

872

873

874

875

## FIGURE LEGENDS

876

877

878 **Figure 1** Map of baby's breath sampling locations in Michigan. Seven were located throughout  
879 Sleeping Bear Dunes National Lakeshore. Park boundary delineated by grey shading in bottom  
880 left panel. Sampling location codes: Grand Marais (GM), Petoskey State Park (PS), Traverse  
881 City (TC), Good Harbor Bay (GHB), Sleeping Bear Point (SBP), Dune Climb (DC), Dune  
882 Plateau (DP), Empire Bluffs (EB), Platte Bay (PB), South Boundary (SB), Zetterberg Preserve  
883 (ZP), Arcadia Dunes (AD).

884

885 **Figure 2** Results from Bayesian cluster analysis based on nSSR data using the program  
886 STRUCTURE (Pritchard et al. 2000) indicate ( $K = 2$ ) population clusters of baby's breath  
887 (Pritchard et al. 2000, Evanno et al. 2005). Cluster 1 (left) includes the three northernmost  
888 populations, and Cluster 2 (right) includes all other populations. Each individual ( $N = 313$ ) is  
889 represented by a line in the plot, and individuals are grouped by population.  
890 Sampling location codes: Grand Marais (GM), Petoskey State Park (PS), Traverse City (TC),  
891 Good Harbor Bay (GHB), Sleeping Bear Point (SBP), Dune Climb (DC), Dune Plateau (DP),  
892 Empire Bluffs (EB), Platte Bay (PB), South Boundary (SB), Zetterberg Preserve (ZP), Arcadia  
893 Dunes (AD).

894

895 **Figure 3** Discriminant analysis of principal components (DAPC) based on baby's breath nSSR  
896 data and calculated in the *adegenet* v2.1.0 (Jombart 2008, Jombart et al. 2010) package for R.  
897 (A) Scatterplot of both discriminant function axes; all individuals ( $n = 313$ ) are included and  
898 represented by a dot. (B) Plot of DAPC sample distribution on discriminant function 1. (C) Table  
899 of individual membership to each DAPC cluster, explained by the PCA eigenvalues used in the  
900 DAPC, based on all 69 identified principal components.  
901 Sampling location codes: Grand Marais (GM), Petoskey State Park (PS), Traverse City (TC),  
902 Good Harbor Bay (GHB), Sleeping Bear Point (SBP), Dune Climb (DC), Dune Plateau (DP),  
903 Empire Bluffs (EB), Platte Bay (PB), South Boundary (SB), Zetterberg Preserve (ZP), Arcadia  
904 Dunes (AD).

905

906 **Figure 4** Mantel tests using transformed pairwise population  $F_{ST}$  values of nSSR data (Slatkin  
907 1995) and straight-line distances (km) between populations based on the mean center latitude  
908 and longitude of each location. (A) Between all populations, (B) between populations in the  
909 Northern region (cluster 1), and (C) between populations in the Southern region (cluster 2)  
910 identified from the Bayesian clustering analysis. Reported p-values based on the one-sided  
911 alternative hypothesis ( $H^1: R > 0$ ).

912

913 **Figure 5** Minimum spanning network based on Nei's genetic distance (Nei 1972) matrix of  
914 baby's breath cpSSR data. Created in the *poppr* v2.8.0 package (Kamvar et al. 2014) for R.  
915 Illustrates the distribution of haplotypes across the 12 populations. Haplotype size indicates  
916 frequency in populations.

917 Sampling location codes: Grand Marais (GM), Petoskey State Park (PS), Traverse City (TC),  
918 Good Harbor Bay (GHB), Sleeping Bear Point (SBP), Dune Climb (DC), Dune Plateau (DP),  
919 Empire Bluffs (EB), Platte Bay (PB), South Boundary (SB), Zetterberg Preserve (ZP), Arcadia  
920 Dunes (AD).

921  
922  
923  
924  
925  
926  
927  
928  
929  
930  
931  
932  
933  
934  
935  
936  
937  
938  
939  
940  
941  
942  
943  
944  
945  
946  
947  
948  
949  
950  
951  
952  
953  
954  
955  
956

957

**Table 1** Characteristics of 14 nSSR loci developed for baby's breath and 2 universal cpSSR loci used in this study.

| Locus <sup>a</sup>    | Primer sequences (5' - 3')                                 | Repeat motif        | Allele size range (bp) | Annealing temperature (°C) | Fluorescent label | Multiplex | GenBank accession no. |
|-----------------------|------------------------------------------------------------|---------------------|------------------------|----------------------------|-------------------|-----------|-----------------------|
| <i>nSSR Loci</i>      |                                                            |                     |                        |                            |                   |           |                       |
| BB_21680              | F: ACTACACACAGACTCGATCCTC<br>R: CTTTGATTGTTTGGTGTAAGTTGC   | (AAAG) <sub>5</sub> | 199 - 218              | 62                         | PET               | PS1       | MH704705              |
| BB_6627               | F: CAAACTCAACCAACCAGACACC<br>R: CACCTCAGCAACAACAGAGTG      | (AAAC) <sub>5</sub> | 151 - 155              | 62                         | FAM               | PS1       | MH704715              |
| BB_3968               | F: CATGGAGGACAATGAGAAGACG<br>R: ACGGTGGTAATGAAGTTTGGTG     | (AGG) <sub>6</sub>  | 207 - 219              | 62                         | FAM               | PS2       | MH704706              |
| BB_5151               | F: TCCACCTTATAACTACCACCC<br>R: TGAGGAAGGATAACAGCTCTCG      | (ACC) <sub>5</sub>  | 205 - 210              | 62                         | PET               | PS2       | MH704712              |
| BB_4443               | F: TAGGGTGGGTGCTTGTACTAAC<br>R: AAAGTGGTGCTGCAGAAGAATC     | (AAG) <sub>16</sub> | 171 - 211              | 62                         | NED               | PS2       | MH704704              |
| BB_31555              | F: TGTATAACTGAGATAACCCAGACG<br>R: TTGTTACCTTGTTCGGCAAAG    | (AC) <sub>7</sub>   | 150 - 156              | 62                         | VIC               | PS2       | MH704716              |
| BB_14751 <sup>b</sup> | F: CCTCAAACCCTAACAAATGCTCC<br>R: TCAGCCGATCCTCTAACACG      | (AAG) <sub>12</sub> | 195 - 248              | 62                         | FAM               | PS3       | MH704713              |
| BB_3335 <sup>b</sup>  | F: TCCACCAAACCTTAAAAGTCC<br>R: CACAGACACAAAGGATCCAACC      | (AGG) <sub>5</sub>  | 215 - 244              | 62                         | NED               | PS3       | MH704701              |
| BB_4258 <sup>b</sup>  | F: TCACAAGAGGCCCAATTTCTTC<br>R: ACTTGAACCCGAACCTATACCC     | (AAT) <sub>5</sub>  | 178 - 195              | 62                         | VIC               | PS3       | MH704714              |
| BB_3913               | F: GGCTGTCGGGTAATAAACACAG<br>R: TCCCAACTCAAGTCATAGCCTAG    | (ACAG) <sub>5</sub> | 159 - 171              | 62                         | PET               | PS3       | MH704702              |
| BB_2888 <sup>b</sup>  | F: CTCATTTCATGTACAAGAGCGC<br>R: AGAACTGGCTATGGATCGAAATG    | (AC) <sub>16</sub>  | 219 - 232              | 63                         | FAM               | PS4       | MH704709              |
| BB_5567               | F: GGCTAGGAAAGTAGGAAGACC<br>R: CGTGTCTGTTTCTCCATGATC       | (AAT) <sub>5</sub>  | 198 - 222              | 62                         | VIC               | PS4       | MH704703              |
| BB_7213 <sup>b</sup>  | F: TTGCATTCCCACCATTTTCATCC<br>R: AGCCAACCTCGTATTAATTGCC    | (AC) <sub>7</sub>   | 161 - 248              | 62                         | PET               | PS4       | MH704708              |
| BB_8681 <sup>b</sup>  | F: ATCTCCAGTTTCCGTGATTTGC<br>R: TACGTCACAAGAGCTTTCAACC     | (ACC) <sub>8</sub>  | 204 - 222              | 62                         | NED               | PS5       | MH704710              |
| <i>cpSSR Loci</i>     |                                                            |                     |                        |                            |                   |           |                       |
| ccsr4                 | F: AGGTTCAAATCTATTGGACGCA<br>R: TTTTGAAAGAAGCTATTCARGAAC   | (T) <sub>8</sub>    | 204 - 219              | 52                         | NED               | –         | –                     |
| ccsr9                 | F: GAGGATACACGACAGARGGARTTG<br>R: CCTATTACAGAGATGGTGYGATTT | (A) <sub>13</sub>   | 199 - 215              | 52                         | PET               | –         | –                     |

Notes : Locus ccsr4 and ccsr9 were developed by Chung and Staub (2003) using chloroplast sequences from *Nicotiana tabacum* L. Sampling location codes: Grand Marais (GM), Petoskey State Park (PS), Traverse City (TC), Good Harbor Bay (GHB), Sleeping Bear Point (SBP), Dune Climb (DC), Dune Plateau (DP), Empire Bluffs (EB), Platte Bay (PB), South Boundary (SB), Zetterberg Preserve (ZP), Arcadia Dunes (AD). <sup>a</sup>Optimal annealing temperature was 62°C for all loci except for BB\_2888, where it was 63 °C. <sup>b</sup>Used 2.5 mM MgCl<sub>2</sub> per sample to amplify locus.

958

959

960

961

**Table 2** Genetic diversity indices for baby's breath from each sampling location at 14 nSSRs and 2 cpSSRs.

|                       | Sampling Locations |               |               |               |               |                |               |               |         |               |                 |               |
|-----------------------|--------------------|---------------|---------------|---------------|---------------|----------------|---------------|---------------|---------|---------------|-----------------|---------------|
|                       | GM                 | PS            | TC            | GHB           | SBP           | DC             | DP            | EB            | PB      | SB            | ZP              | AD            |
| <b>nSSR Loci</b>      |                    |               |               |               |               |                |               |               |         |               |                 |               |
| <i>BB_21680</i>       |                    |               |               |               |               |                |               |               |         |               |                 |               |
| <i>N</i>              | 35                 | 30            | 30            | 20            | 25            | 23             | 30            | 19            | 20      | 20            | 30              | 30            |
| <i>N<sub>A</sub></i>  | 3                  | 3             | 4             | 3             | 3             | 4              | 3             | 4             | 3       | 4             | 4               | 3             |
| <i>H<sub>O</sub></i>  | 0.286              | 0.667         | 0.300         | 0.450         | 0.440         | 0.522          | 0.500         | 0.421         | 0.500   | 0.400         | 0.500           | 0.700         |
| <i>H<sub>E</sub></i>  | 0.411              | 0.539         | 0.534         | 0.540         | 0.582         | 0.481          | 0.540         | 0.676         | 0.524   | 0.510         | 0.548           | 0.546         |
| <i>F<sub>IS</sub></i> | <b>0.3186</b>      | -0.2198       | <b>0.4517</b> | 0.1915        | 0.2636        | -0.0624        | 0.0909        | <b>0.4000</b> | 0.0709  | <b>0.2400</b> | 0.1040          | -0.2661       |
| <i>BB_6627</i>        |                    |               |               |               |               |                |               |               |         |               |                 |               |
| <i>N</i>              | 35                 | 30            | 30            | 20            | 24            | 23             | 30            | 20            | 20      | 20            | 30              | 30            |
| <i>N<sub>A</sub></i>  | 2                  | 1             | 2             | 2             | 2             | 2              | 2             | 2             | 2       | 2             | 2               | 2             |
| <i>H<sub>O</sub></i>  | 0.086              | 0.000         | 0.167         | 0.500         | 0.333         | 0.435          | 0.500         | 0.250         | 0.450   | 0.550         | 0.300           | 0.467         |
| <i>H<sub>E</sub></i>  | 0.082              | 0.000         | 0.153         | 0.480         | 0.330         | 0.499          | 0.495         | 0.219         | 0.489   | 0.439         | 0.255           | 0.464         |
| <i>F<sub>IS</sub></i> | -0.0303            | -             | -0.0741       | -0.0160       | 0.0108        | 0.1506         | 0.0068        | -0.1176       | 0.1047  | -0.2294       | -0.1600         | 0.0122        |
| <i>BB_3968</i>        |                    |               |               |               |               |                |               |               |         |               |                 |               |
| <i>N</i>              | 35                 | 30            | 30            | 20            | 25            | 23             | 30            | 20            | 20      | 20            | 30              | 30            |
| <i>N<sub>A</sub></i>  | 3                  | 2             | 1             | 4             | 3             | 3              | 4             | 4             | 3       | 4             | 3               | 2             |
| <i>H<sub>O</sub></i>  | 0.143              | 0.067         | 0.000         | 0.400         | 0.240         | 0.304          | 0.367         | 0.450         | 0.550   | 0.400         | 0.500           | 0.133         |
| <i>H<sub>E</sub></i>  | 0.207              | 0.064         | 0.000         | 0.476         | 0.246         | 0.334          | 0.414         | 0.475         | 0.509   | 0.345         | 0.418           | 0.180         |
| <i>F<sub>IS</sub></i> | <b>0.3241</b>      | -0.0175       | -             | 0.1850        | 0.0432        | 0.1098         | 0.1320        | 0.0782        | -0.0556 | -0.1343       | -0.1805         | 0.2750        |
| <i>BB_5151</i>        |                    |               |               |               |               |                |               |               |         |               |                 |               |
| <i>N</i>              | 35                 | 29            | 30            | 19            | 25            | 23             | 30            | 19            | 20      | 20            | 30              | 28            |
| <i>N<sub>A</sub></i>  | 2                  | 2             | 2             | 2             | 2             | 2              | 2             | 2             | 2       | 2             | 2               | 2             |
| <i>H<sub>O</sub></i>  | 0.057              | 0.034         | 0.133         | 0.158         | 0.200         | 0.391          | 0.467         | 0.526         | 0.400   | 0.400         | 0.200           | 0.179         |
| <i>H<sub>E</sub></i>  | 0.056              | 0.034         | 0.231         | 0.494         | 0.449         | 0.466          | 0.491         | 0.465         | 0.480   | 0.375         | 0.180           | 0.499         |
| <i>F<sub>IS</sub></i> | -0.0149            | -0.018        | 0.4369        | <b>0.6949</b> | <b>0.5683</b> | 0.1818         | 0.0667        | -0.1043       | 0.1915  | -0.0411       | -0.0943         | <b>0.6530</b> |
| <i>BB_4443</i>        |                    |               |               |               |               |                |               |               |         |               |                 |               |
| <i>N</i>              | 35                 | 30            | 30            | 20            | 25            | 23             | 30            | 19            | 20      | 19            | 30              | 30            |
| <i>N<sub>A</sub></i>  | 3                  | 5             | 3             | 9             | 9             | 9 <sup>A</sup> | 9             | 5             | 11      | 7             | 10 <sup>A</sup> | 5             |
| <i>H<sub>O</sub></i>  | 0.257              | 0.800         | 0.400         | 0.800         | 0.640         | 0.783          | 0.767         | 0.842         | 0.900   | 0.526         | 0.667           | 0.567         |
| <i>H<sub>E</sub></i>  | 0.338              | 0.701         | 0.399         | 0.808         | 0.769         | 0.778          | 0.758         | 0.749         | 0.853   | 0.593         | 0.651           | 0.663         |
| <i>F<sub>IS</sub></i> | <b>0.2537</b>      | -0.1244       | 0.0156        | 0.0349        | 0.1804        | 0.0161         | 0.0052        | -0.0971       | -0.0301 | 0.2193        | -0.0078         | 0.1623        |
| <i>BB_31555</i>       |                    |               |               |               |               |                |               |               |         |               |                 |               |
| <i>N</i>              | 28                 | 30            | 30            | 20            | 25            | 23             | 30            | 20            | 20      | 20            | 30              | 30            |
| <i>N<sub>A</sub></i>  | 1                  | 2             | 2             | 3             | 4             | 4              | 4             | 4             | 4       | 4             | 4               | 3             |
| <i>H<sub>O</sub></i>  | 0.000              | 0.233         | 0.333         | 0.650         | 0.800         | 0.478          | 0.600         | 0.650         | 0.750   | 0.500         | 0.600           | 0.467         |
| <i>H<sub>E</sub></i>  | 0.000              | 0.255         | 0.278         | 0.609         | 0.727         | 0.650          | 0.614         | 0.654         | 0.745   | 0.583         | 0.663           | 0.545         |
| <i>F<sub>IS</sub></i> | -                  | 0.1018        | -0.1837       | -0.0422       | -0.0799       | 0.2851         | 0.0396        | 0.0314        | 0.0189  | 0.1667        | 0.1122          | 0.1603        |
| <i>BB_14751</i>       |                    |               |               |               |               |                |               |               |         |               |                 |               |
| <i>N</i>              | 34                 | 30            | 30            | 20            | 25            | 23             | 30            | 20            | 20      | 20            | 28              | 30            |
| <i>N<sub>A</sub></i>  | 5 <sup>A</sup>     | 3             | 4             | 7             | 6             | 7              | 8             | 9             | 9       | 10            | 6               | 7             |
| <i>H<sub>O</sub></i>  | 0.676              | 0.200         | 0.467         | 0.650         | 0.600         | 0.478          | 0.633         | 0.800         | 0.600   | 0.650         | 0.750           | 0.467         |
| <i>H<sub>E</sub></i>  | 0.666              | 0.287         | 0.548         | 0.714         | 0.633         | 0.618          | 0.769         | 0.790         | 0.621   | 0.646         | 0.675           | 0.762         |
| <i>F<sub>IS</sub></i> | <b>-0.0013</b>     | 0.3176        | -0.0899       | 0.1099        | 0.0722        | 0.2473         | 0.1933        | 0.0130        | 0.0579  | 0.0159        | -0.0925         | 0.2632        |
| <i>BB_3335</i>        |                    |               |               |               |               |                |               |               |         |               |                 |               |
| <i>N</i>              | 33                 | 30            | 30            | 20            | 25            | 23             | 30            | 20            | 20      | 20            | 30              | 30            |
| <i>N<sub>A</sub></i>  | 5                  | 3             | 4             | 8             | 8             | 9              | 7             | 5             | 9       | 10            | 8               | 6             |
| <i>H<sub>O</sub></i>  | 0.242              | 0.500         | 0.433         | 0.800         | 0.760         | 0.826          | 0.667         | 0.800         | 0.750   | 0.850         | 0.767           | 0.600         |
| <i>H<sub>E</sub></i>  | 0.403              | 0.562         | 0.369         | 0.818         | 0.732         | 0.827          | 0.817         | 0.694         | 0.808   | 0.815         | 0.789           | 0.709         |
| <i>F<sub>IS</sub></i> | <b>0.4115</b>      | <b>0.1265</b> | -0.1564       | 0.0470        | -0.0179       | 0.0234         | <b>0.2000</b> | -0.1280       | 0.0967  | -0.0173       | 0.0451          | 0.1701        |

Notes: *N* number of individuals, *N<sub>A</sub>* number of alleles per locus, *H<sub>O</sub>* observed heterozygosity, *H<sub>E</sub>* expected heterozygosity, *F<sub>IS</sub>* inbreeding coefficient (Weir and Cockerham 1984), *A<sub>R</sub>* allelic richness for each population averaged across loci, *H* haploid diversity, *N<sub>H</sub>* number of haplotypes for each population averaged across loci, *H<sub>R</sub>* haplotype richness for each population averaged across loci. Bold values indicate loci that deviated from Hardy-Weinberg equilibrium. <sup>A</sup> denotes a private allele, <sup>P</sup> denotes a private haplotype. Sampling location codes: Grand Marais (GM), Petoskey State Park (PS), Traverse City (TC), Good Harbor Bay (GHB), Sleeping Bear Point (SBP), Dune Climb (DC), Dune Plateau (DP), Empire Bluffs (EB), Platte Bay (PB), South Boundary (SB), Zetterberg Preserve (ZP), Arcadia Dunes (AD).

**Table 2 (Cont)** Genetic diversity indices for baby's breath from each sampling location at 14 nSSRs and 2 cpSSRs.

|                                  | Sampling Locations |               |         |                |         |               |                |               |         |                |         |         |
|----------------------------------|--------------------|---------------|---------|----------------|---------|---------------|----------------|---------------|---------|----------------|---------|---------|
|                                  | GM                 | PS            | TC      | GHB            | SBP     | DC            | DP             | EB            | PB      | SB             | ZP      | AD      |
| <b>nSSR Loci</b>                 |                    |               |         |                |         |               |                |               |         |                |         |         |
| <i>BB_4258</i>                   |                    |               |         |                |         |               |                |               |         |                |         |         |
| <i>N</i>                         | 35                 | 30            | 30      | 20             | 25      | 23            | 30             | 20            | 20      | 20             | 30      | 30      |
| <i>N<sub>A</sub></i>             | 1                  | 1             | 2       | 3 <sup>A</sup> | 2       | 2             | 2              | 1             | 2       | 4 <sup>A</sup> | 3       | 2       |
| <i>H<sub>O</sub></i>             | 0.000              | 0.000         | 0.133   | 0.150          | 0.240   | 0.087         | 0.033          | 0.000         | 0.150   | 0.250          | 0.400   | 0.300   |
| <i>H<sub>E</sub></i>             | 0.000              | 0.000         | 0.124   | 0.141          | 0.269   | 0.083         | 0.033          | 0.000         | 0.139   | 0.228          | 0.326   | 0.339   |
| <i>F<sub>IS</sub></i>            | –                  | –             | –0.0545 | –0.0364        | 0.1273  | –0.0233       | –0.017         | –             | –0.0556 | –0.0734        | –0.2104 | 0.1329  |
| <i>BB_3913</i>                   |                    |               |         |                |         |               |                |               |         |                |         |         |
| <i>N</i>                         | 35                 | 30            | 30      | 20             | 25      | 23            | 30             | 20            | 20      | 20             | 30      | 30      |
| <i>N<sub>A</sub></i>             | 3                  | 2             | 3       | 4              | 4       | 4             | 4              | 4             | 4       | 4              | 4       | 2       |
| <i>H<sub>O</sub></i>             | 0.171              | 0.133         | 0.300   | 0.400          | 0.480   | 0.565         | 0.667          | 0.550         | 0.500   | 0.550          | 0.600   | 0.467   |
| <i>H<sub>E</sub></i>             | 0.207              | 0.124         | 0.292   | 0.471          | 0.537   | 0.619         | 0.578          | 0.614         | 0.494   | 0.621          | 0.638   | 0.444   |
| <i>F<sub>IS</sub></i>            | 0.1873             | –0.0545       | –0.0166 | 0.1762         | 0.1259  | 0.1090        | –0.1373        | <b>0.1292</b> | 0.0130  | 0.1399         | 0.0769  | –0.0331 |
| <i>BB_2888</i>                   |                    |               |         |                |         |               |                |               |         |                |         |         |
| <i>N</i>                         | 35                 | 29            | 30      | 20             | 25      | 23            | 30             | 20            | 20      | 20             | 30      | 30      |
| <i>N<sub>A</sub></i>             | 4                  | 2             | 3       | 4              | 6       | 6             | 5              | 6             | 5       | 6 <sup>A</sup> | 6       | 5       |
| <i>H<sub>O</sub></i>             | 0.657              | 0.586         | 0.600   | 0.800          | 0.680   | 0.913         | 0.833          | 0.750         | 0.800   | 0.800          | 0.900   | 0.667   |
| <i>H<sub>E</sub></i>             | 0.594              | 0.498         | 0.651   | 0.734          | 0.724   | 0.772         | 0.793          | 0.768         | 0.746   | 0.734          | 0.786   | 0.589   |
| <i>F<sub>IS</sub></i>            | –0.0922            | –0.1610       | 0.0953  | –0.0648        | 0.0811  | –0.1608       | –0.0335        | 0.0484        | –0.0465 | –0.0648        | –0.1282 | –0.1154 |
| <i>BB_5567</i>                   |                    |               |         |                |         |               |                |               |         |                |         |         |
| <i>N</i>                         | 35                 | 30            | 30      | 20             | 25      | 23            | 30             | 20            | 20      | 20             | 30      | 30      |
| <i>N<sub>A</sub></i>             | 4                  | 3             | 4       | 5              | 3       | 3             | 4              | 3             | 4       | 3              | 5       | 5       |
| <i>H<sub>O</sub></i>             | 0.629              | 0.533         | 0.567   | 0.700          | 0.480   | 0.609         | 0.667          | 0.400         | 0.550   | 0.400          | 0.600   | 0.767   |
| <i>H<sub>E</sub></i>             | 0.716              | 0.613         | 0.562   | 0.745          | 0.614   | 0.474         | 0.604          | 0.374         | 0.589   | 0.371          | 0.613   | 0.716   |
| <i>F<sub>IS</sub></i>            | <b>0.1368</b>      | 0.1463        | 0.0080  | 0.0859         | 0.2371  | –0.2649       | <b>–0.0872</b> | –0.0447       | 0.0913  | –0.0519        | 0.0387  | –0.0545 |
| <i>BB_7213</i>                   |                    |               |         |                |         |               |                |               |         |                |         |         |
| <i>N</i>                         | 35                 | 30            | 30      | 20             | 25      | 23            | 30             | 20            | 20      | 20             | 30      | 30      |
| <i>N<sub>A</sub></i>             | 3                  | 2             | 3       | 3              | 4       | 3             | 3              | 3             | 3       | 5              | 5       | 3       |
| <i>H<sub>O</sub></i>             | 0.229              | 0.367         | 0.100   | 0.500          | 0.640   | 0.391         | 0.500          | 0.400         | 0.650   | 0.500          | 0.633   | 0.667   |
| <i>H<sub>E</sub></i>             | 0.359              | 0.375         | 0.096   | 0.434          | 0.642   | 0.638         | 0.565          | 0.386         | 0.611   | 0.499          | 0.599   | 0.633   |
| <i>F<sub>IS</sub></i>            | <b>0.3754</b>      | 0.0392        | –0.0235 | –0.1276        | 0.0241  | <b>0.4054</b> | 0.1317         | –0.0100       | –0.0378 | 0.0231         | –0.0406 | –0.0366 |
| <i>BB_8681</i>                   |                    |               |         |                |         |               |                |               |         |                |         |         |
| <i>N</i>                         | 35                 | 28            | 30      | 20             | 24      | 22            | 30             | 19            | 20      | 20             | 30      | 30      |
| <i>N<sub>A</sub></i>             | 3                  | 3             | 2       | 3              | 3       | 3             | 4              | 2             | 3       | 3              | 4       | 3       |
| <i>H<sub>O</sub></i>             | 0.114              | 0.357         | 0.333   | 0.500          | 0.500   | 0.136         | 0.400          | 0.211         | 0.250   | 0.300          | 0.467   | 0.600   |
| <i>H<sub>E</sub></i>             | 0.109              | 0.523         | 0.320   | 0.395          | 0.469   | 0.206         | 0.456          | 0.188         | 0.265   | 0.464          | 0.502   | 0.438   |
| <i>F<sub>IS</sub></i>            | –0.0342            | <b>0.3333</b> | –0.0247 | –0.2418        | –0.0455 | 0.3571        | 0.1397         | –0.0909       | 0.0821  | <b>0.3753</b>  | 0.0866  | –0.3558 |
| <i>A<sub>R</sub> across loci</i> | 2.660              | 2.320         | 2.540   | 3.970          | 3.750   | 3.920         | 3.990          | 3.660         | 4.070   | 4.210          | 4.190   | 3.120   |
| <b>cpSSR Loci</b>                |                    |               |         |                |         |               |                |               |         |                |         |         |
| <i>ccssr4</i>                    |                    |               |         |                |         |               |                |               |         |                |         |         |
| <i>N</i>                         | 35                 | 30            | 29      | 20             | 25      | 23            | 30             | 20            | 20      | 20             | 30      | 30      |
| <i>N<sub>A</sub></i>             | 2                  | 1             | 1       | 1              | 1       | 1             | 1              | 1             | 1       | 2              | 2       | 1       |
| <i>H</i>                         | 0.25               | 0.00          | 0.00    | 0.00           | 0.00    | 0.00          | 0.00           | 0.00          | 0.00    | 0.32           | 0.50    | 0.00    |
| <i>ccssr9</i>                    |                    |               |         |                |         |               |                |               |         |                |         |         |
| <i>N</i>                         | 35                 | 30            | 29      | 20             | 25      | 23            | 30             | 20            | 20      | 20             | 30      | 30      |
| <i>N<sub>A</sub></i>             | 2 <sup>A</sup>     | 1             | 1       | 1              | 1       | 1             | 1              | 1             | 1       | 2              | 2       | 1       |
| <i>H</i>                         | 0.25               | 0.00          | 0.00    | 0.00           | 0.00    | 0.00          | 0.00           | 0.00          | 0.00    | 0.10           | 0.12    | 0.00    |
| <i>N<sub>H</sub> across loci</i> | 2 <sup>P</sup>     | 1             | 1       | 1              | 1       | 1             | 1              | 1             | 1       | 3              | 3       | 1       |
| <i>H<sub>R</sub> across loci</i> | 0.991              | 0             | 0       | 0              | 0       | 0             | 0              | 0             | 0       | 2              | 1.897   | 0       |

Notes : *N* number of individuals, *N<sub>A</sub>* number of alleles per locus, *H<sub>O</sub>* observed heterozygosity, *H<sub>E</sub>* expected heterozygosity, *F<sub>IS</sub>* inbreeding coefficient (Weir and Cockerham 1984), *A<sub>R</sub>* allelic richness for each population averaged across loci, *H* haploid diversity, *N<sub>H</sub>* number of haplotypes for each population averaged across loci, *H<sub>R</sub>* haplotype richness for each population averaged across loci. Bold values indicate loci that deviated from Hardy-Weinberg equilibrium. <sup>A</sup> denotes a private allele, <sup>P</sup> denotes a private haplotype. Sampling location codes: Grand Marais (GM), Petoskey State Park (PS), Traverse City (TC), Good Harbor Bay (GHB), Sleeping Bear Point (SBP), Dune Climb (DC), Dune Plateau (DP), Empire Bluffs (EB), Platte Bay (PB), South Boundary (SB), Zetterberg Preserve (ZP), Arcadia Dunes (AD).

966  
967  
968  
969

**Table 3** Pairwise  $F_{ST}$  values for nSSR data among all sampling locations based on Weir and Cockerham's (1984) estimate. Darker color – increasing  $F_{ST}$  value, lighter color – decreasing  $F_{ST}$  value.

|     | GM    | PS    | TC    | GHB   | SBP   | DC    | DP    | EB    | PB    | SB    | ZP    | AD |
|-----|-------|-------|-------|-------|-------|-------|-------|-------|-------|-------|-------|----|
| GM  | –     | –     | –     | –     | –     | –     | –     | –     | –     | –     | –     | –  |
| PS  | 0.221 | –     | –     | –     | –     | –     | –     | –     | –     | –     | –     | –  |
| TC  | 0.147 | 0.121 | –     | –     | –     | –     | –     | –     | –     | –     | –     | –  |
| GHB | 0.264 | 0.245 | 0.221 | –     | –     | –     | –     | –     | –     | –     | –     | –  |
| SBP | 0.261 | 0.246 | 0.230 | 0.047 | –     | –     | –     | –     | –     | –     | –     | –  |
| DC  | 0.321 | 0.320 | 0.277 | 0.063 | 0.041 | –     | –     | –     | –     | –     | –     | –  |
| DP  | 0.272 | 0.265 | 0.246 | 0.026 | 0.029 | 0.025 | –     | –     | –     | –     | –     | –  |
| EB  | 0.220 | 0.240 | 0.175 | 0.081 | 0.069 | 0.093 | 0.083 | –     | –     | –     | –     | –  |
| PB  | 0.290 | 0.283 | 0.260 | 0.062 | 0.040 | 0.050 | 0.050 | 0.106 | –     | –     | –     | –  |
| SB  | 0.253 | 0.266 | 0.207 | 0.094 | 0.057 | 0.077 | 0.069 | 0.068 | 0.066 | –     | –     | –  |
| ZP  | 0.240 | 0.238 | 0.211 | 0.071 | 0.040 | 0.090 | 0.055 | 0.071 | 0.082 | 0.017 | –     | –  |
| AD  | 0.298 | 0.254 | 0.231 | 0.121 | 0.121 | 0.137 | 0.123 | 0.170 | 0.128 | 0.132 | 0.128 | –  |

*Notes*: All values significant at  $P \leq 0.005$  after FDR correction (Benjamini and Hochberg 1995). Sampling location codes: Grand Marais (GM), Petoskey State Park (PS), Traverse City (TC), Good Harbor Bay (GHB), Sleeping Bear Point (SBP), Dune Climb (DC), Dune Plateau (DP), Empire Bluffs (EB), Platte Bay (PB), South Boundary (SB), Zetterberg Preserve (ZP), Arcadia Dunes (AD).

970  
971  
972  
973  
974  
975  
976  
977  
978  
979  
980  
981  
982  
983  
984  
985  
986  
987  
988  
989  
990  
991  
992

993  
994  
995

## FIGURES

Figure 1

996  
997

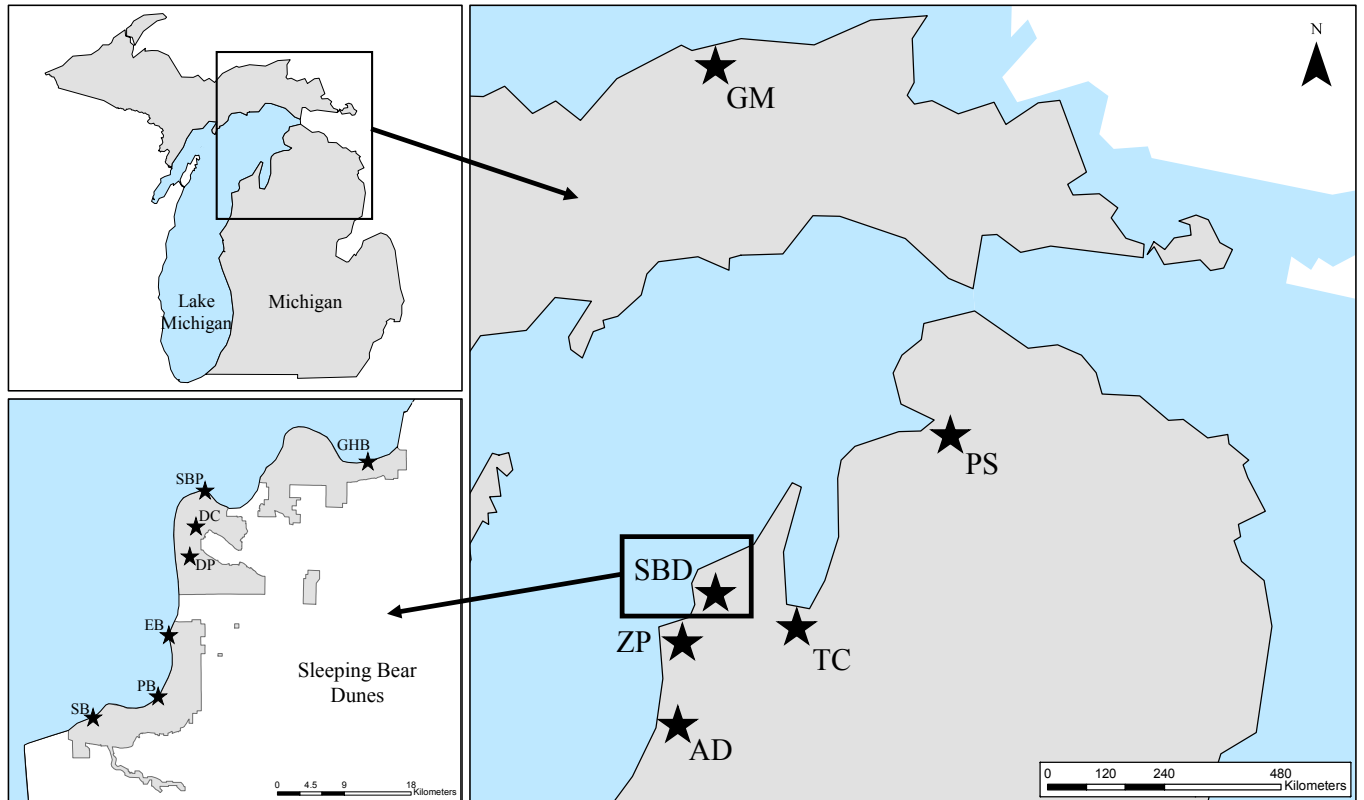

998

999

1000

1001

1002

1003

1004

1005

1006



1007

1008

1009

1010

1011

**Figure 2**

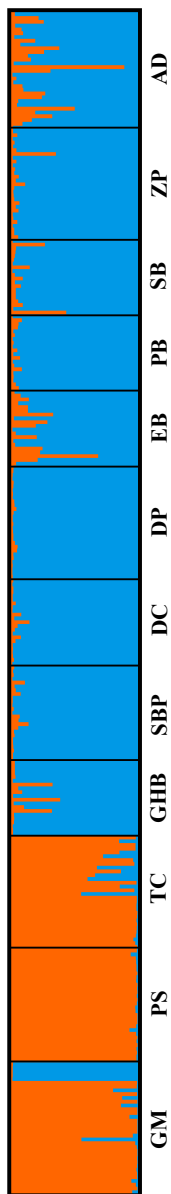

1012

1013

1014

### Figure 3

1015

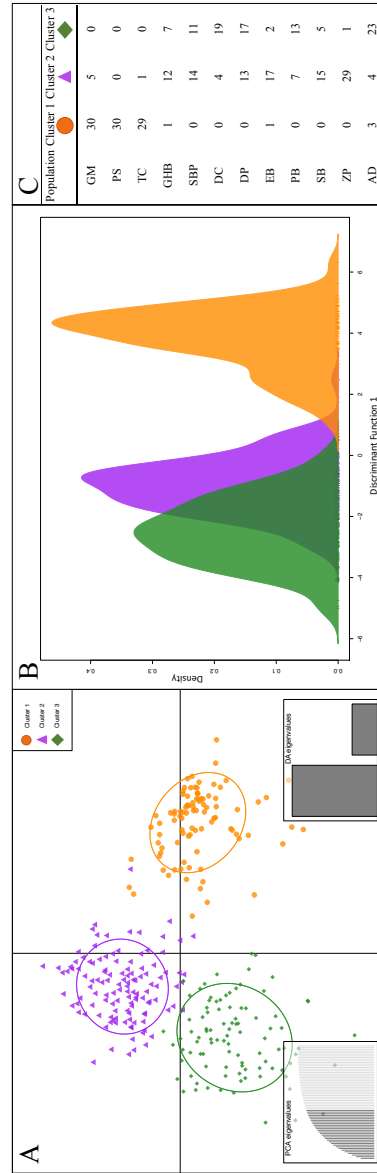

1016

1017

1018

1019

1020

1021

1022

1023

Figure 4

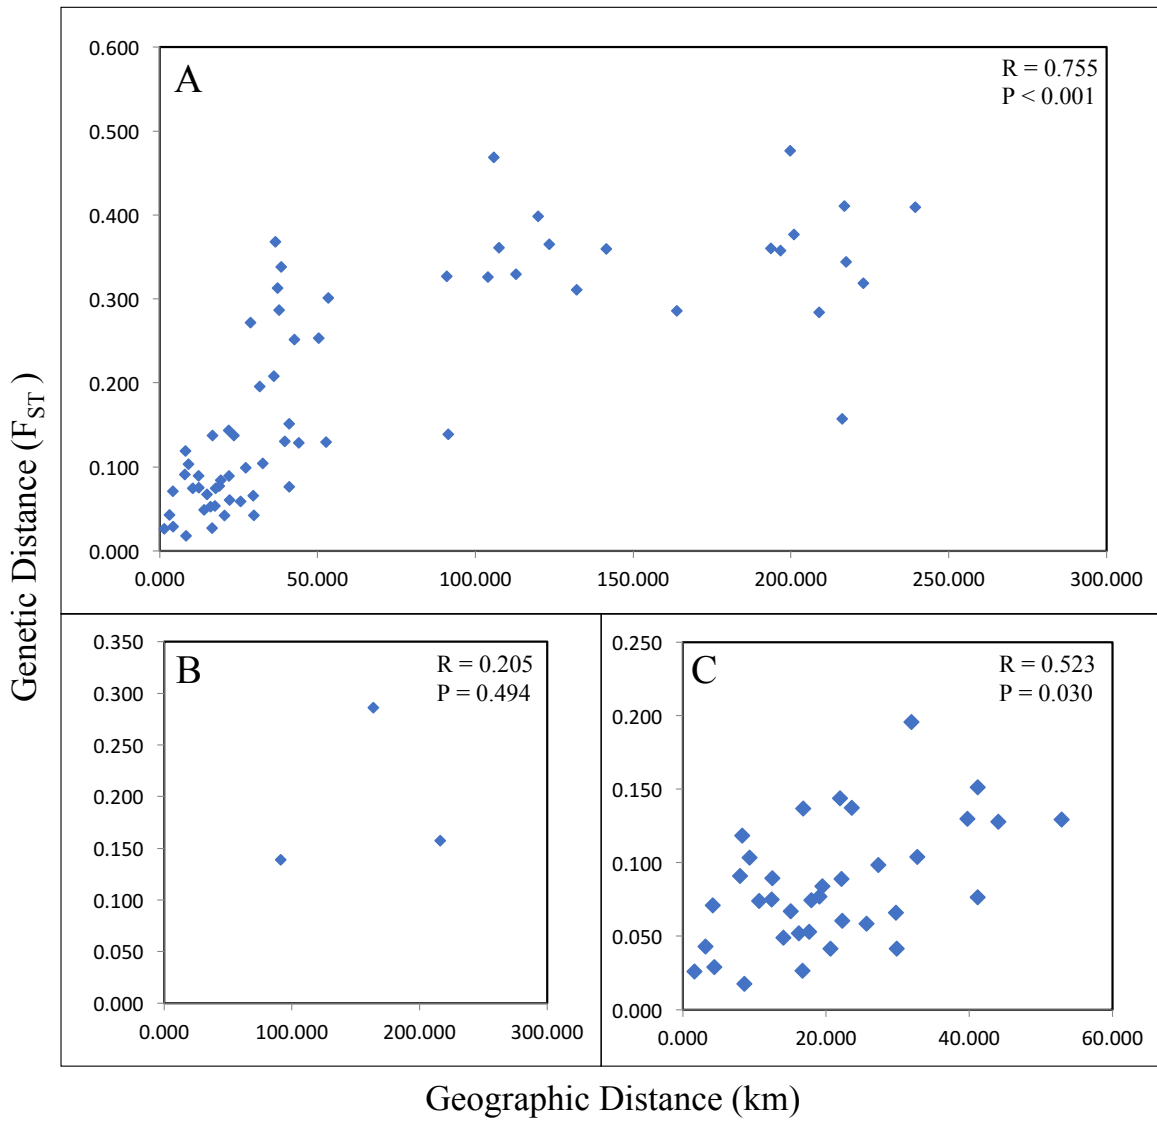

1024

1025

1026

1027

1028

1029

1030

1031

1032

Figure 5

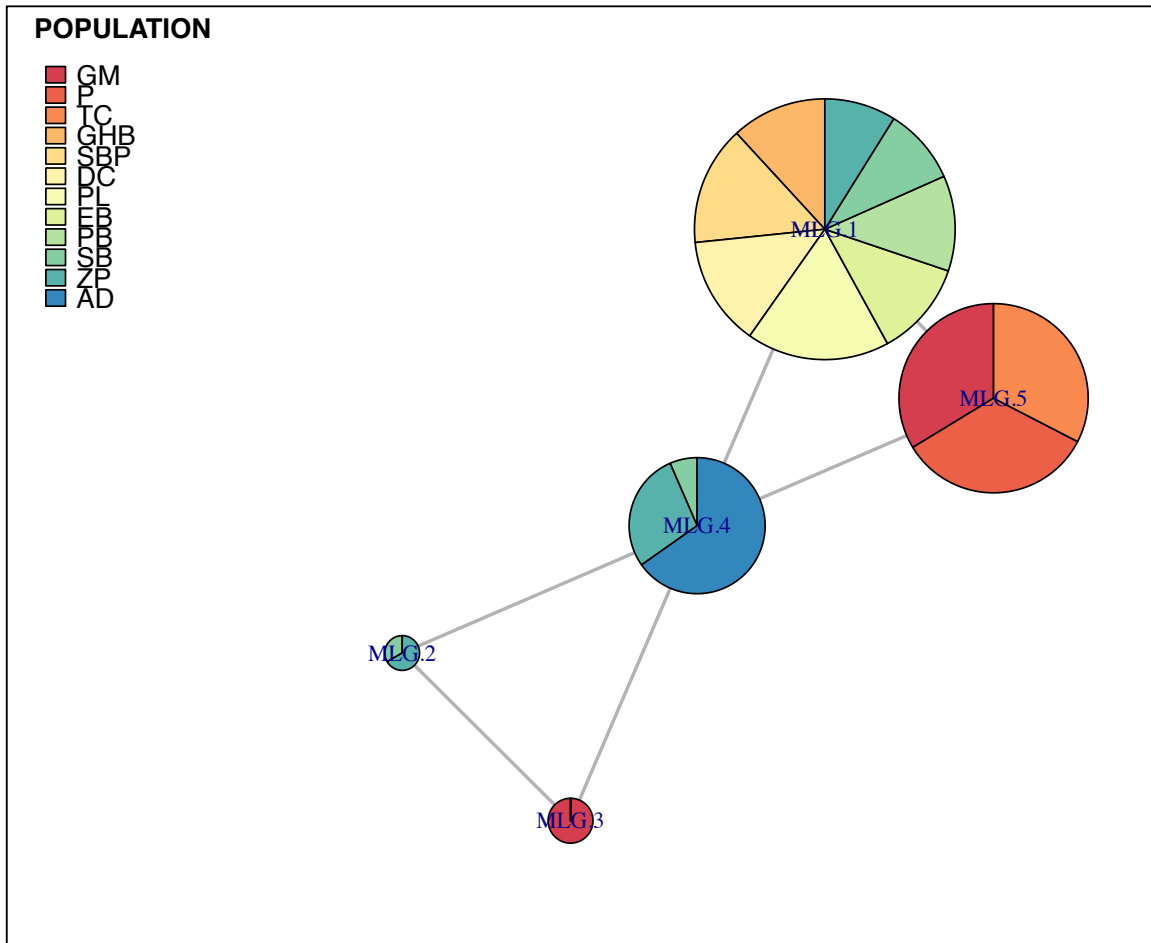

1033

1034

1035

1036

1037

1038

1039

1040

1041

1042

1043

**Supplemental A** Sampling location names and geographic coordinates for baby's breath analyzed in this study. All locations are in Michigan. Location abbreviations are used in the main text and following tables and figures.

| Sampling Location (Code)  | <i>n</i> | Latitude    | Longitude    |
|---------------------------|----------|-------------|--------------|
| Grand Marais (GM)         | 35       | 46.67825579 | -85.97546860 |
| Petoskey State Park (PS)  | 30       | 45.40288418 | -84.91271857 |
| Traverse City (TC)        | 30       | 44.74865647 | -85.61882032 |
| Good Harbor Bay (GHB)     | 20       | 44.93877954 | -85.86802898 |
| Sleeping Bear Point (SBP) | 25       | 44.91095892 | -86.04209863 |
| Dune Climb (DC)           | 23       | 44.88285396 | -86.04280635 |
| Dune Plateau (DP)         | 30       | 44.87312491 | -86.05846389 |
| Empire Bluff (EB)         | 20       | 44.80154168 | -86.07121955 |
| Platte Bay (PB)           | 20       | 44.73111860 | -86.10566158 |
| South Boundary (SB)       | 20       | 44.72858265 | -86.15892124 |
| Zetterberg Preserve (ZP)  | 30       | 44.68665052 | -86.25030285 |
| Arcadia Dunes (AD)        | 30       | 44.53662395 | -86.22527264 |

*Notes*: *n* number of individuals sampled.

1044

1045

1046

1047

1048

1049

1050

1051

1052

1053

1054

1055

1056

1057

1058  
1059  
1060  
1061  
1062

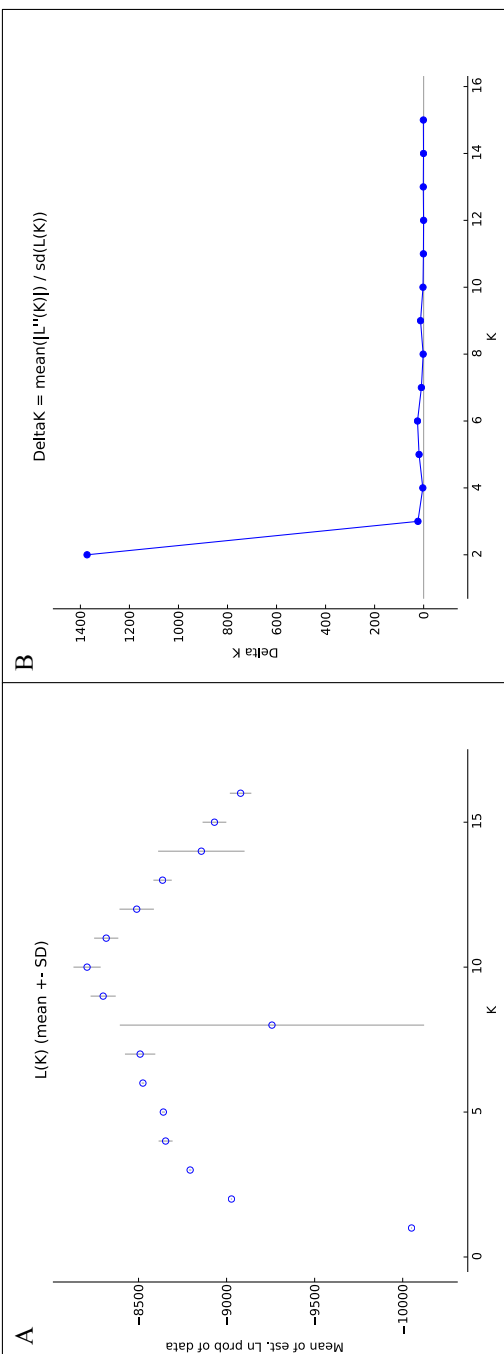

**Supplemental B** Bayesian clustering analysis of all 12 baby's breath populations from the program STRUCTURE (Pritchard et al. 2000). (A) Mean  $L(K)$  ( $\pm$  SD) over 10 runs for each value of  $K$ . (B) Plot of Evanno's  $\Delta K$  method (Evanno et al. 2005) where the largest rate of change suggests the highest likelihood of cluster number. This analysis was run without inferring any prior information on sampling location, and two genetic clusters were inferred from this data.

1063  
1064  
1065  
1066  
1067

1068  
1069  
1070  
1071  
1072  
1073  
1074  
1075

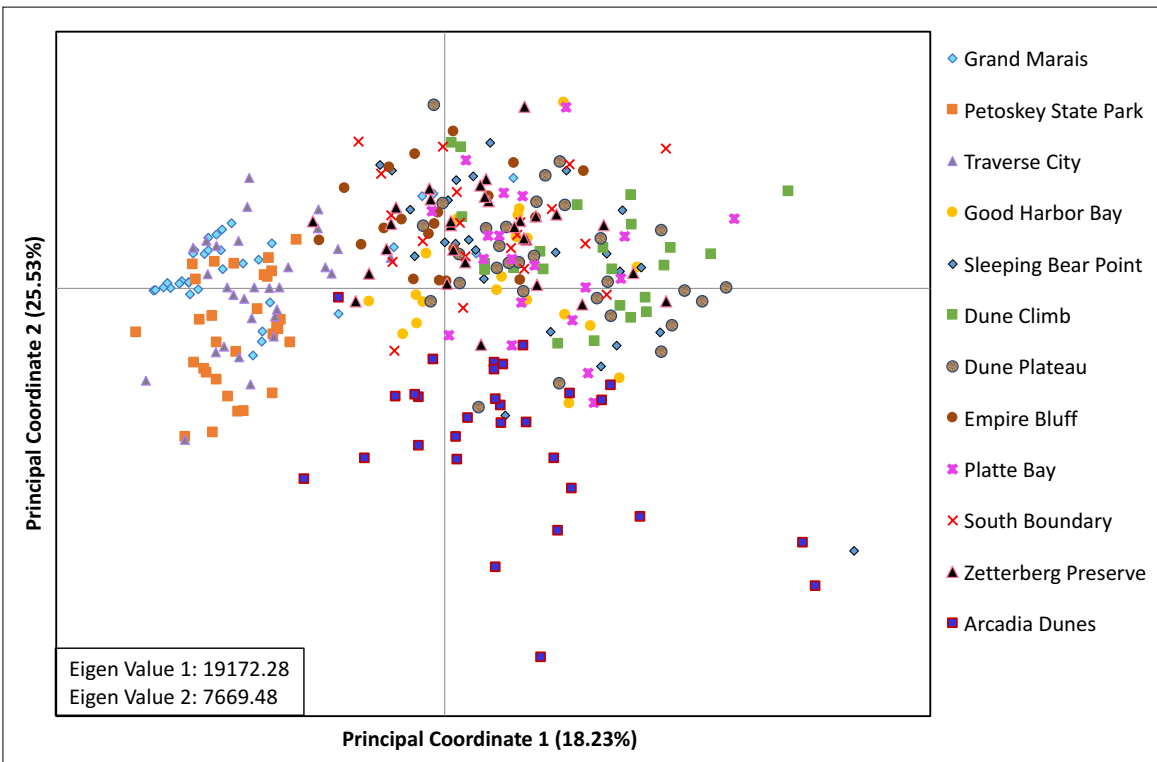

**Supplemental C** Principal Coordinates Analysis (PCoA) based on a genotypic distance matrix between all baby's breath individuals performed in GenAlEx 6.502 (Peakall and Smouse 2006, 2012). Individuals labeled by sampling location.

1076  
1077  
1078  
1079  
1080  
1081  
1082  
1083  
1084  
1085  
1086  
1087  
1088

1089  
1090  
1091

**Supplemental D** Analysis of Molecular Variance (AMOVA) for 14 nuclear and 2 chloroplast SSR loci in 12 populations of baby's breath. Regional differences identified in the Bayesian clustering analysis ( $K = 2$ ) were included in AMOVA, and the analysis was based on  $\Phi$  estimates to compare variance across both marker types following Excoffier et al. (1992) and Weir and Cockerham (1984).

| Source of Variation              | nSSRs |                |                     |           | cpSSRs |                |                     |           |
|----------------------------------|-------|----------------|---------------------|-----------|--------|----------------|---------------------|-----------|
|                                  | df    | % of Variation | $\Phi$ - statistics | P - value | df     | % of Variation | $\Phi$ - statistics | P - value |
| Among regions                    | 1     | 22.62          | 0.226               | 0.0001    | 1      | 26.27          | 0.263               | 0.0001    |
| Among populations within regions | 10    | 12.89          | 0.167               | 0.0001    | 10     | 47.37          | 0.643               | 0.0001    |
| Within populations               | 301   | 64.49          | 0.355               | 0.0001    | 301    | 26.36          | 0.736               | 0.0001    |

1092  
1093  
1094
